# Supplementary material for: K2S2O8-glucose mediated oxidative coupling of alcohols with indoles for synthesis of bis(indolyl)methanes in water
Source: Royal Society of Chemistry journal article supplement (doi:10.1039/d2nj02525f), 2022-01-01

## Supporting Information

### **K<sub>2</sub>S<sub>2</sub>O<sub>8</sub>-glucose mediated oxidative coupling of alcohols with indoles for synthesis of Bis(indolyl)methanes in water**

Harish K Indurthi<sup>a</sup>, Samarpita Das<sup>a</sup>, Amita Kumari<sup>b</sup>, Deepak K Sharma<sup>\*a</sup>

a. Department of Pharmaceutical Engg. And Tech., IIT-Banaras Hindu University, Varanasi, UP, 221005, Email id:

[deepak.phe@itbhu.ac.in](mailto:deepak.phe@itbhu.ac.in)

b. CSIR-Institute of Himalayan Bioresource Technology, Palampur (H.P.) 176061

### Table of Contents

|    |                                                     |        |
|----|-----------------------------------------------------|--------|
| 1. | <sup>1</sup> H and <sup>13</sup> C NMR Spectra..... | S2-S19 |
|----|-----------------------------------------------------|--------|

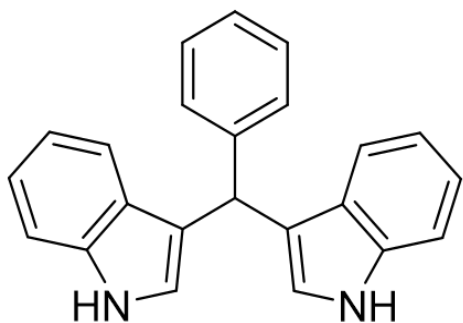

**1a**

<sup>1</sup>H NMR, CDCl<sub>3</sub>

7.873  
7.441  
7.425  
7.380  
7.372  
7.356  
7.316  
7.206  
6.643  
5.924

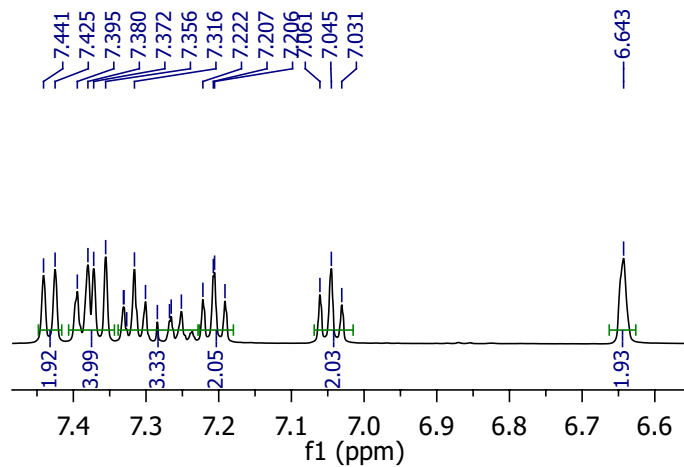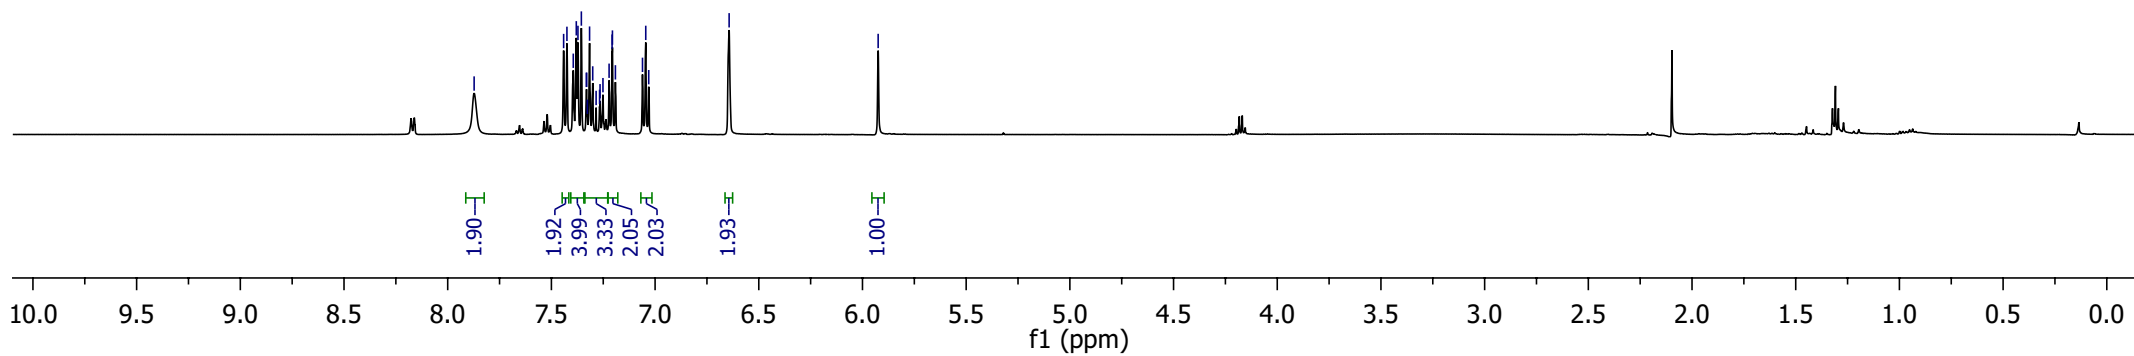

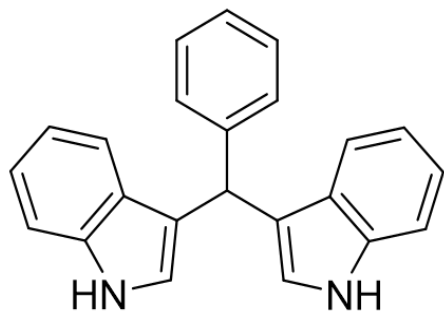

**1a**

<sup>13</sup>C NMR, CDCl<sub>3</sub>

—144.06  
—136.72  
128.76  
128.24  
127.11  
126.16  
123.66  
121.93  
119.96  
119.71  
119.24  
—111.07

77.31  
77.06  
76.80

—40.23

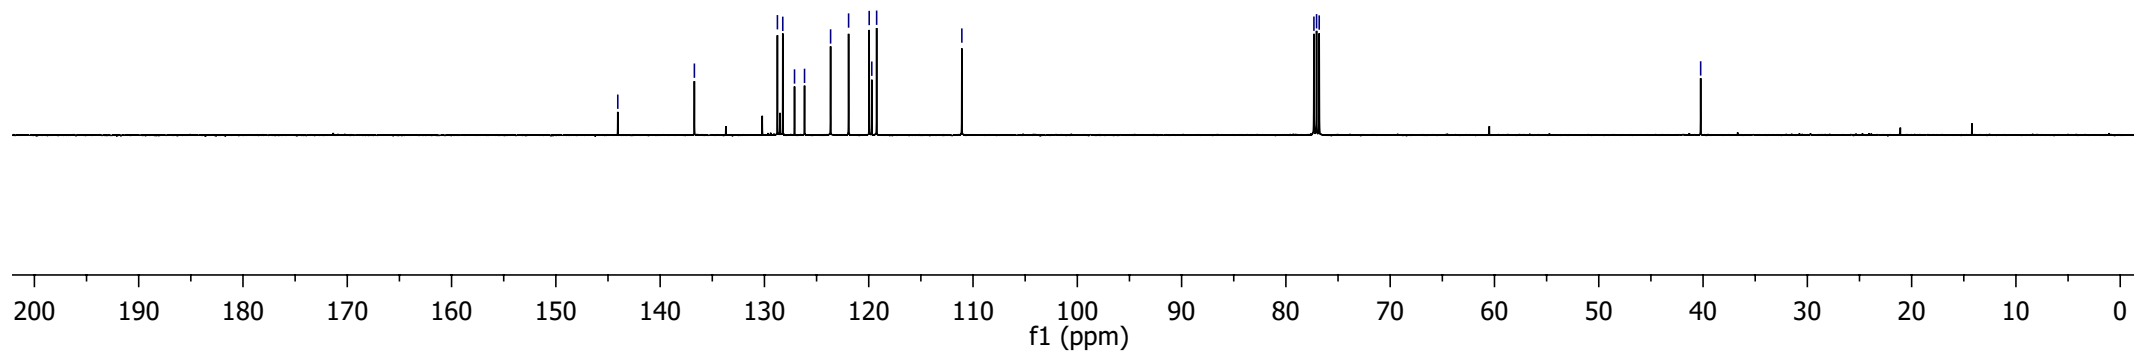

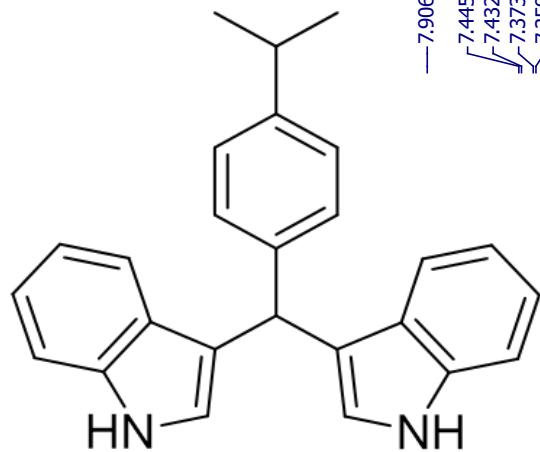

**1d**

**<sup>1</sup>H NMR, CDCl<sub>3</sub>**

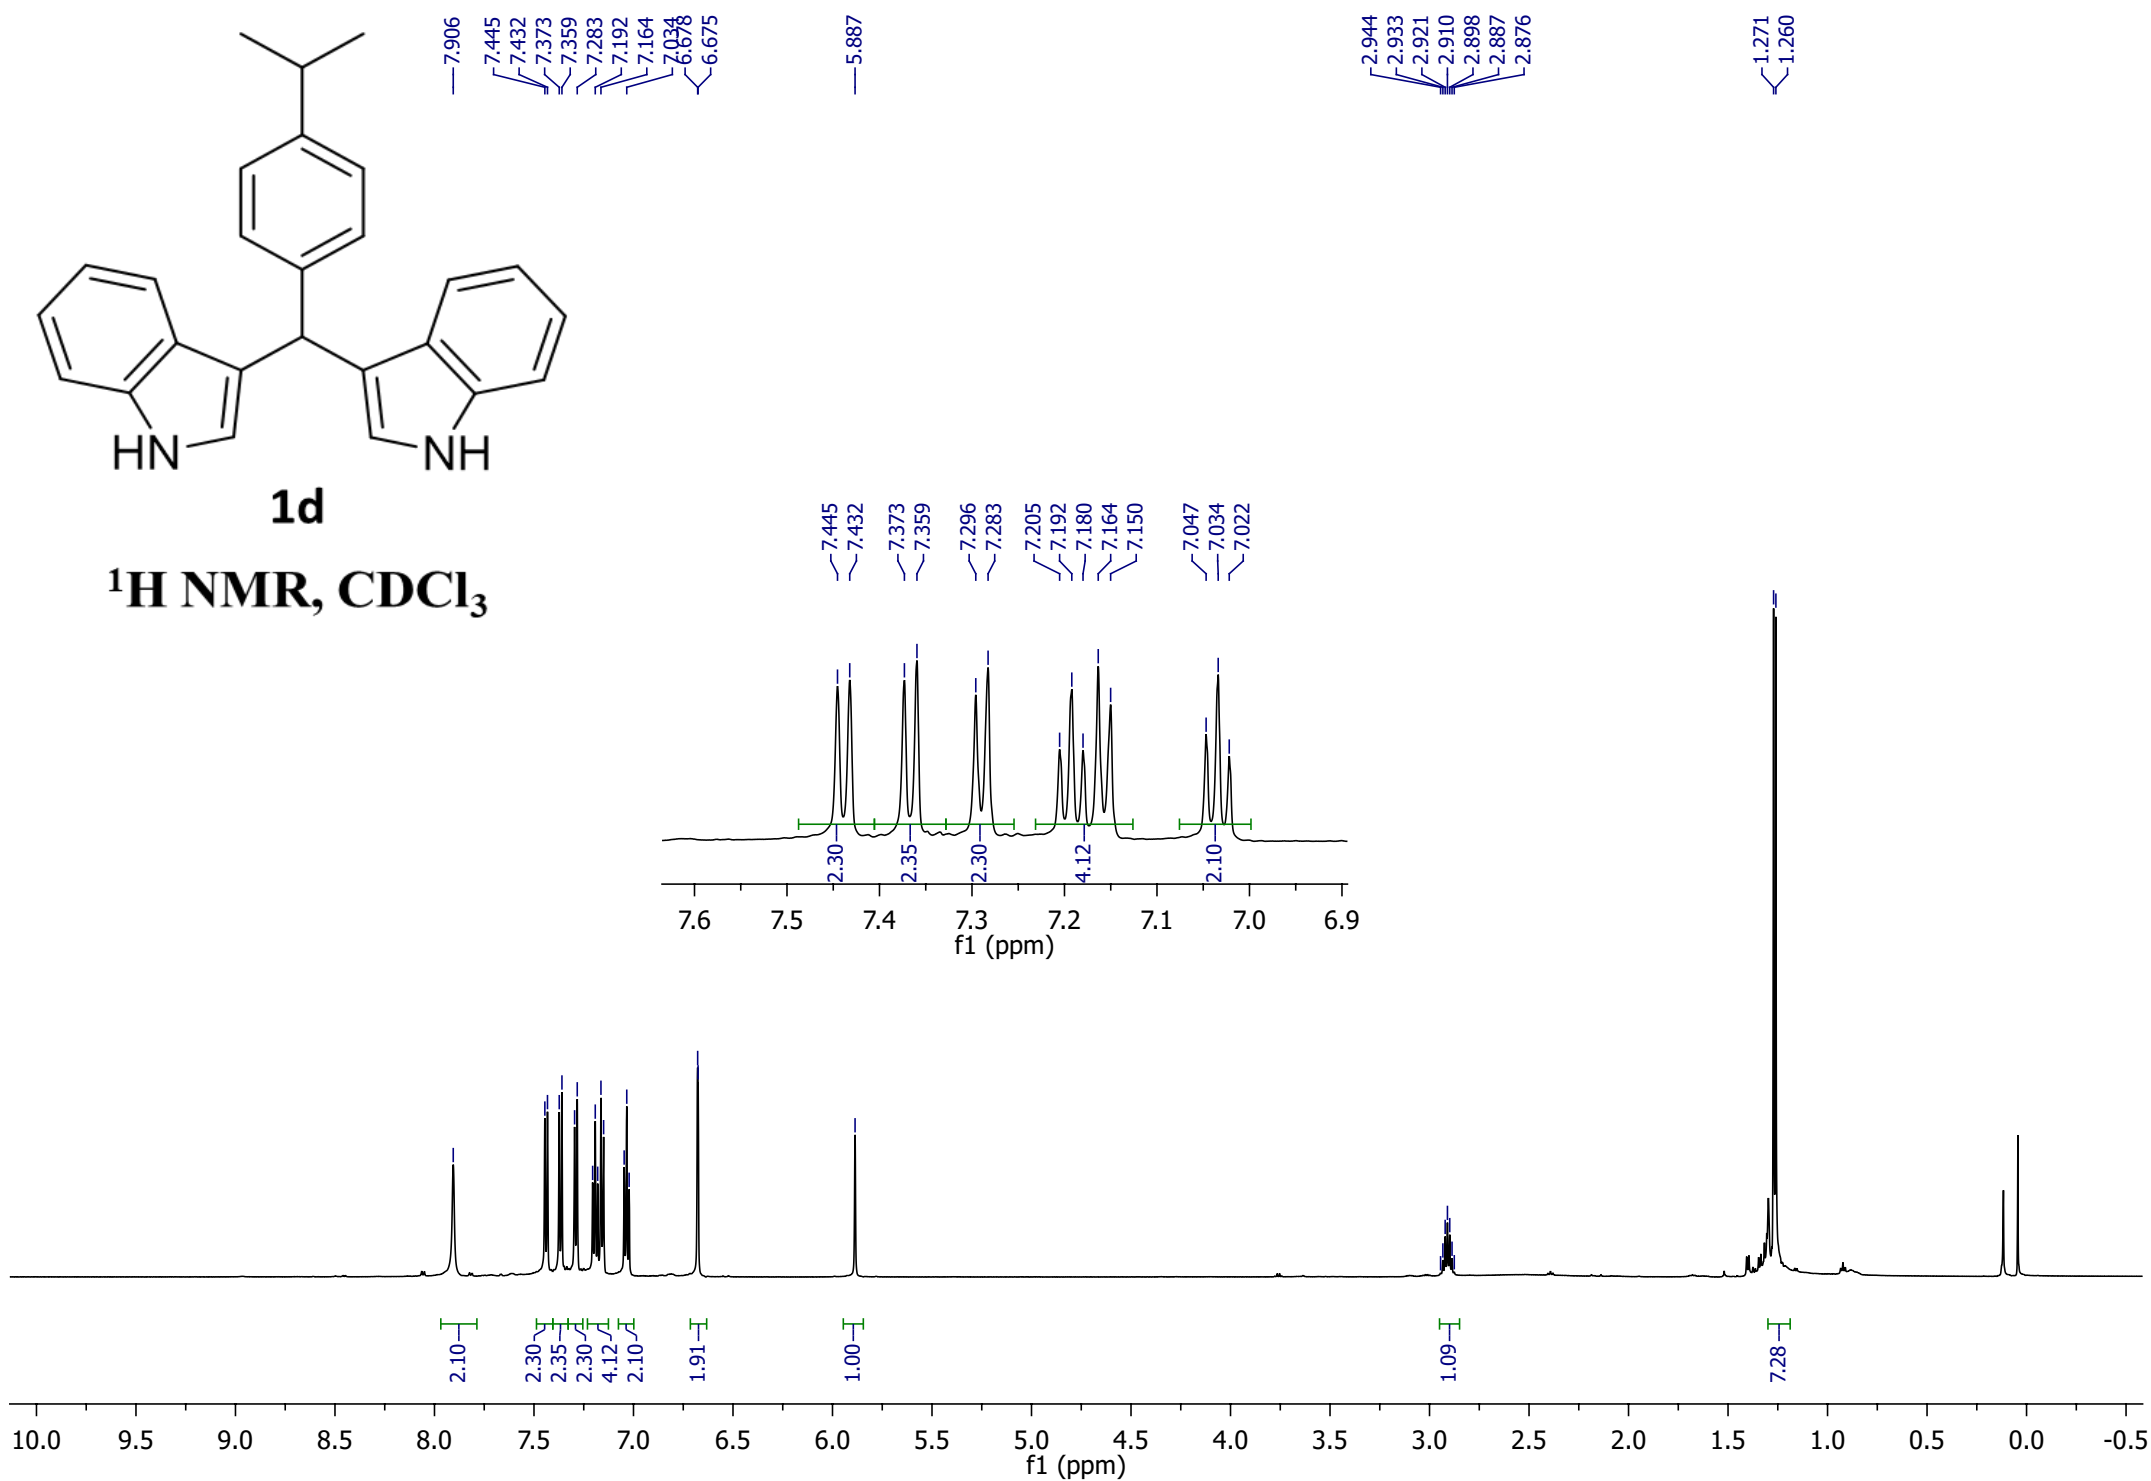

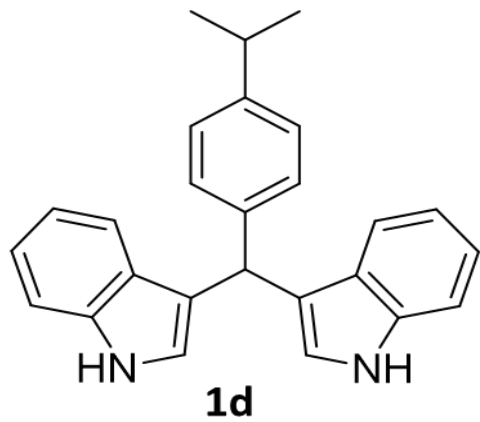

**$^{13}\text{C}$  NMR,  $\text{CDCl}_3$**

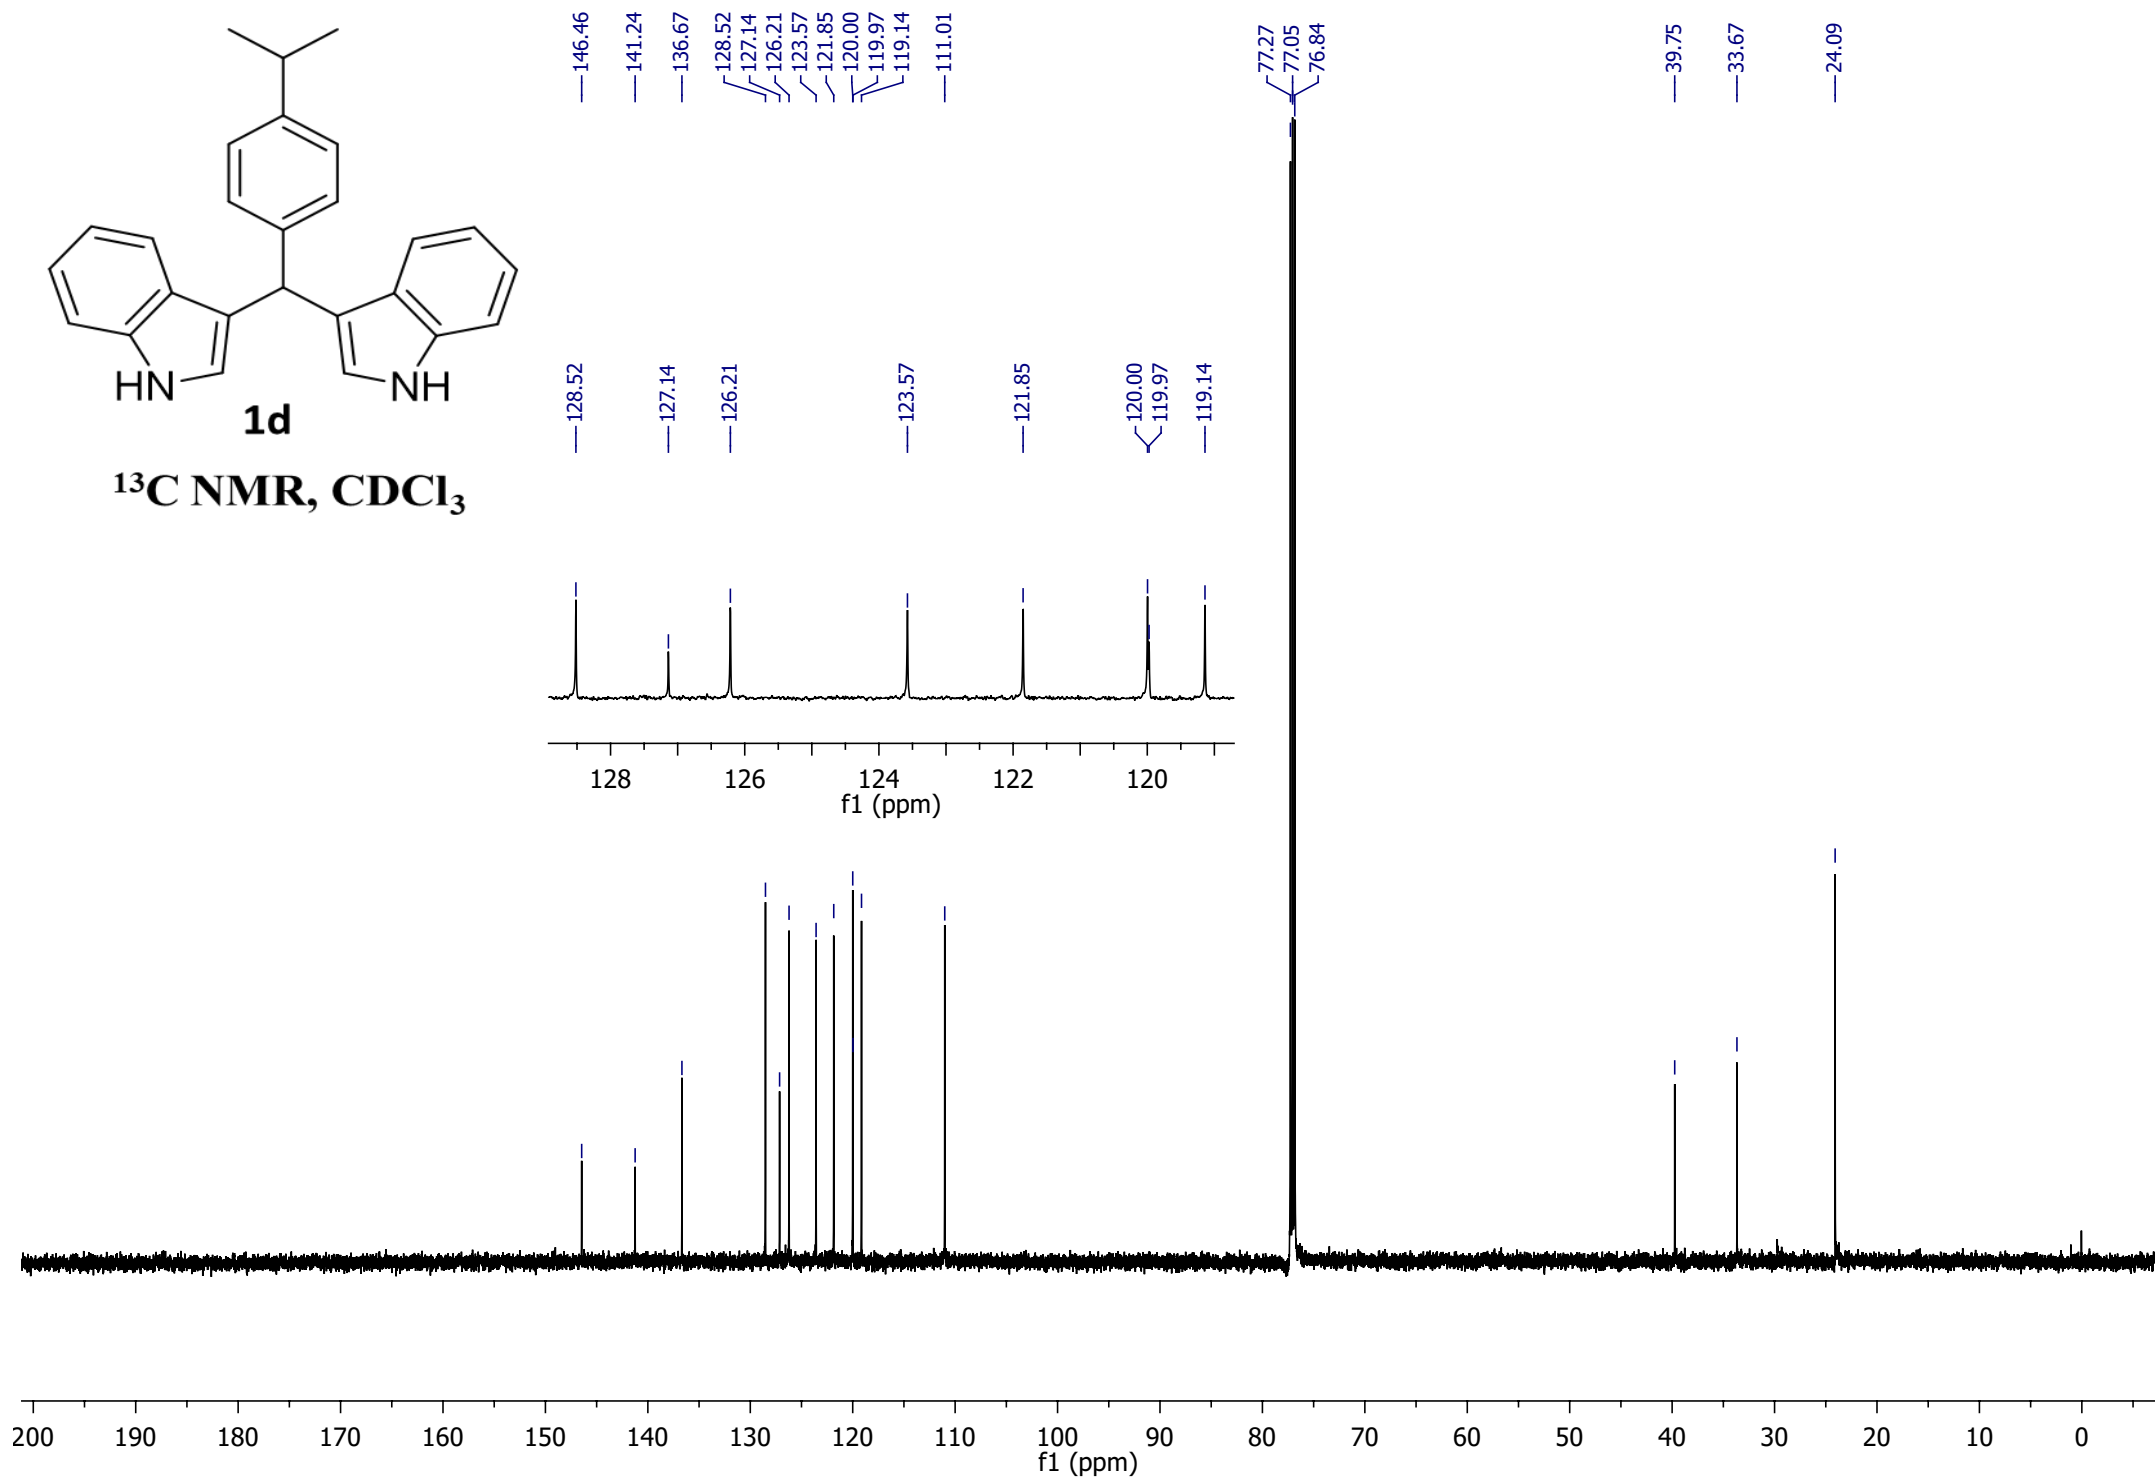

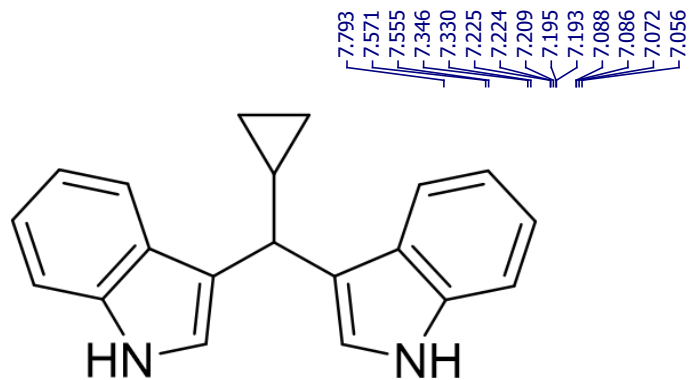

**2d**

**$^1\text{H NMR, CDCl}_3$**

7.793  
7.571  
7.555  
7.346  
7.330  
7.225  
7.224  
7.209  
7.195  
7.193  
7.088  
7.086  
7.072  
7.056

4.052  
4.035

1.629  
1.622  
1.619  
1.612  
1.606  
1.602  
1.596  
1.590  
1.586  
1.580  
0.707  
0.698  
0.696  
0.691  
0.687  
0.682  
0.680  
0.671  
0.465  
0.454  
0.444  
0.434

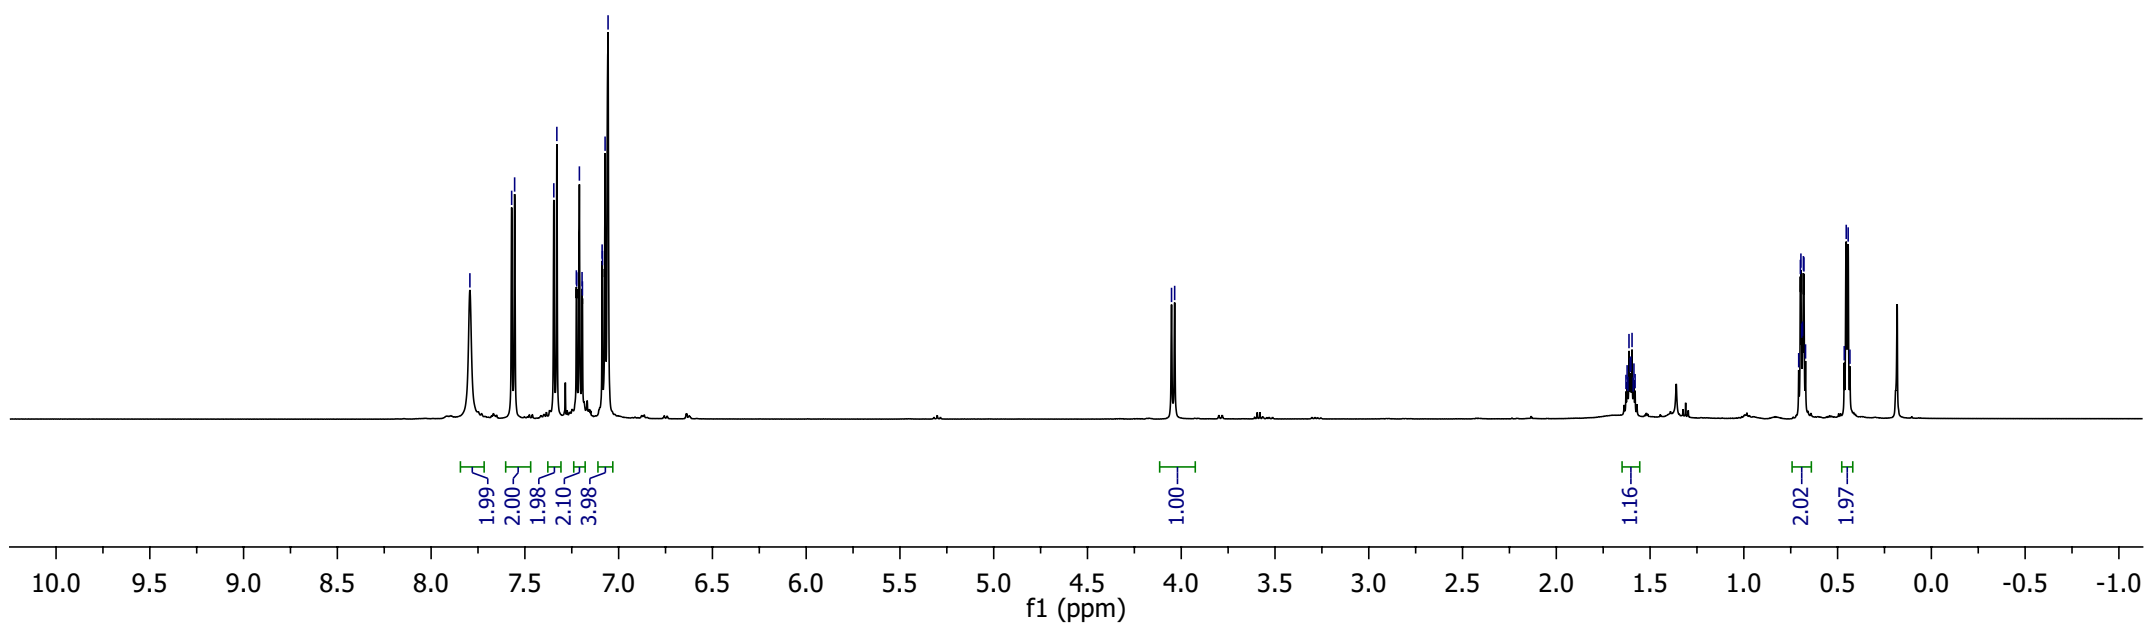

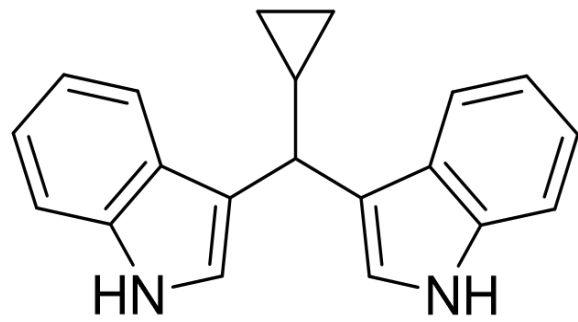

2d

$^{13}\text{C}$  NMR,  $\text{CDCl}_3$

136.56  
127.35  
122.08  
121.72  
120.10  
119.92  
119.07  
111.13

77.38  
77.12  
76.87

38.18

16.88

4.92

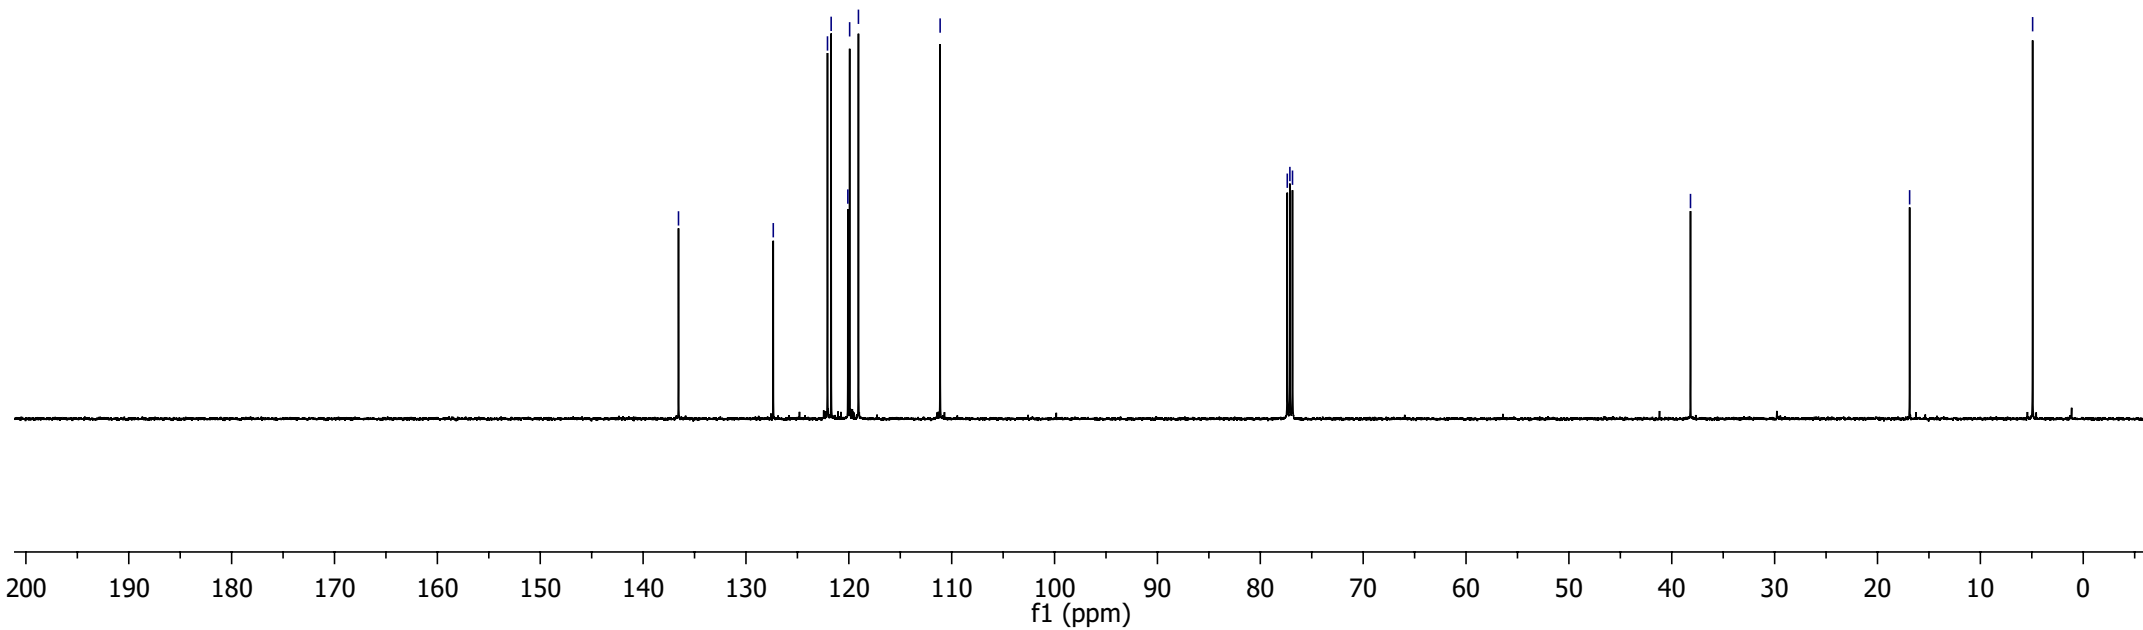

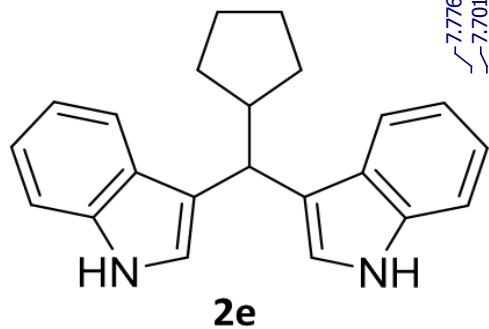

**<sup>1</sup>H NMR, CDCl<sub>3</sub>**

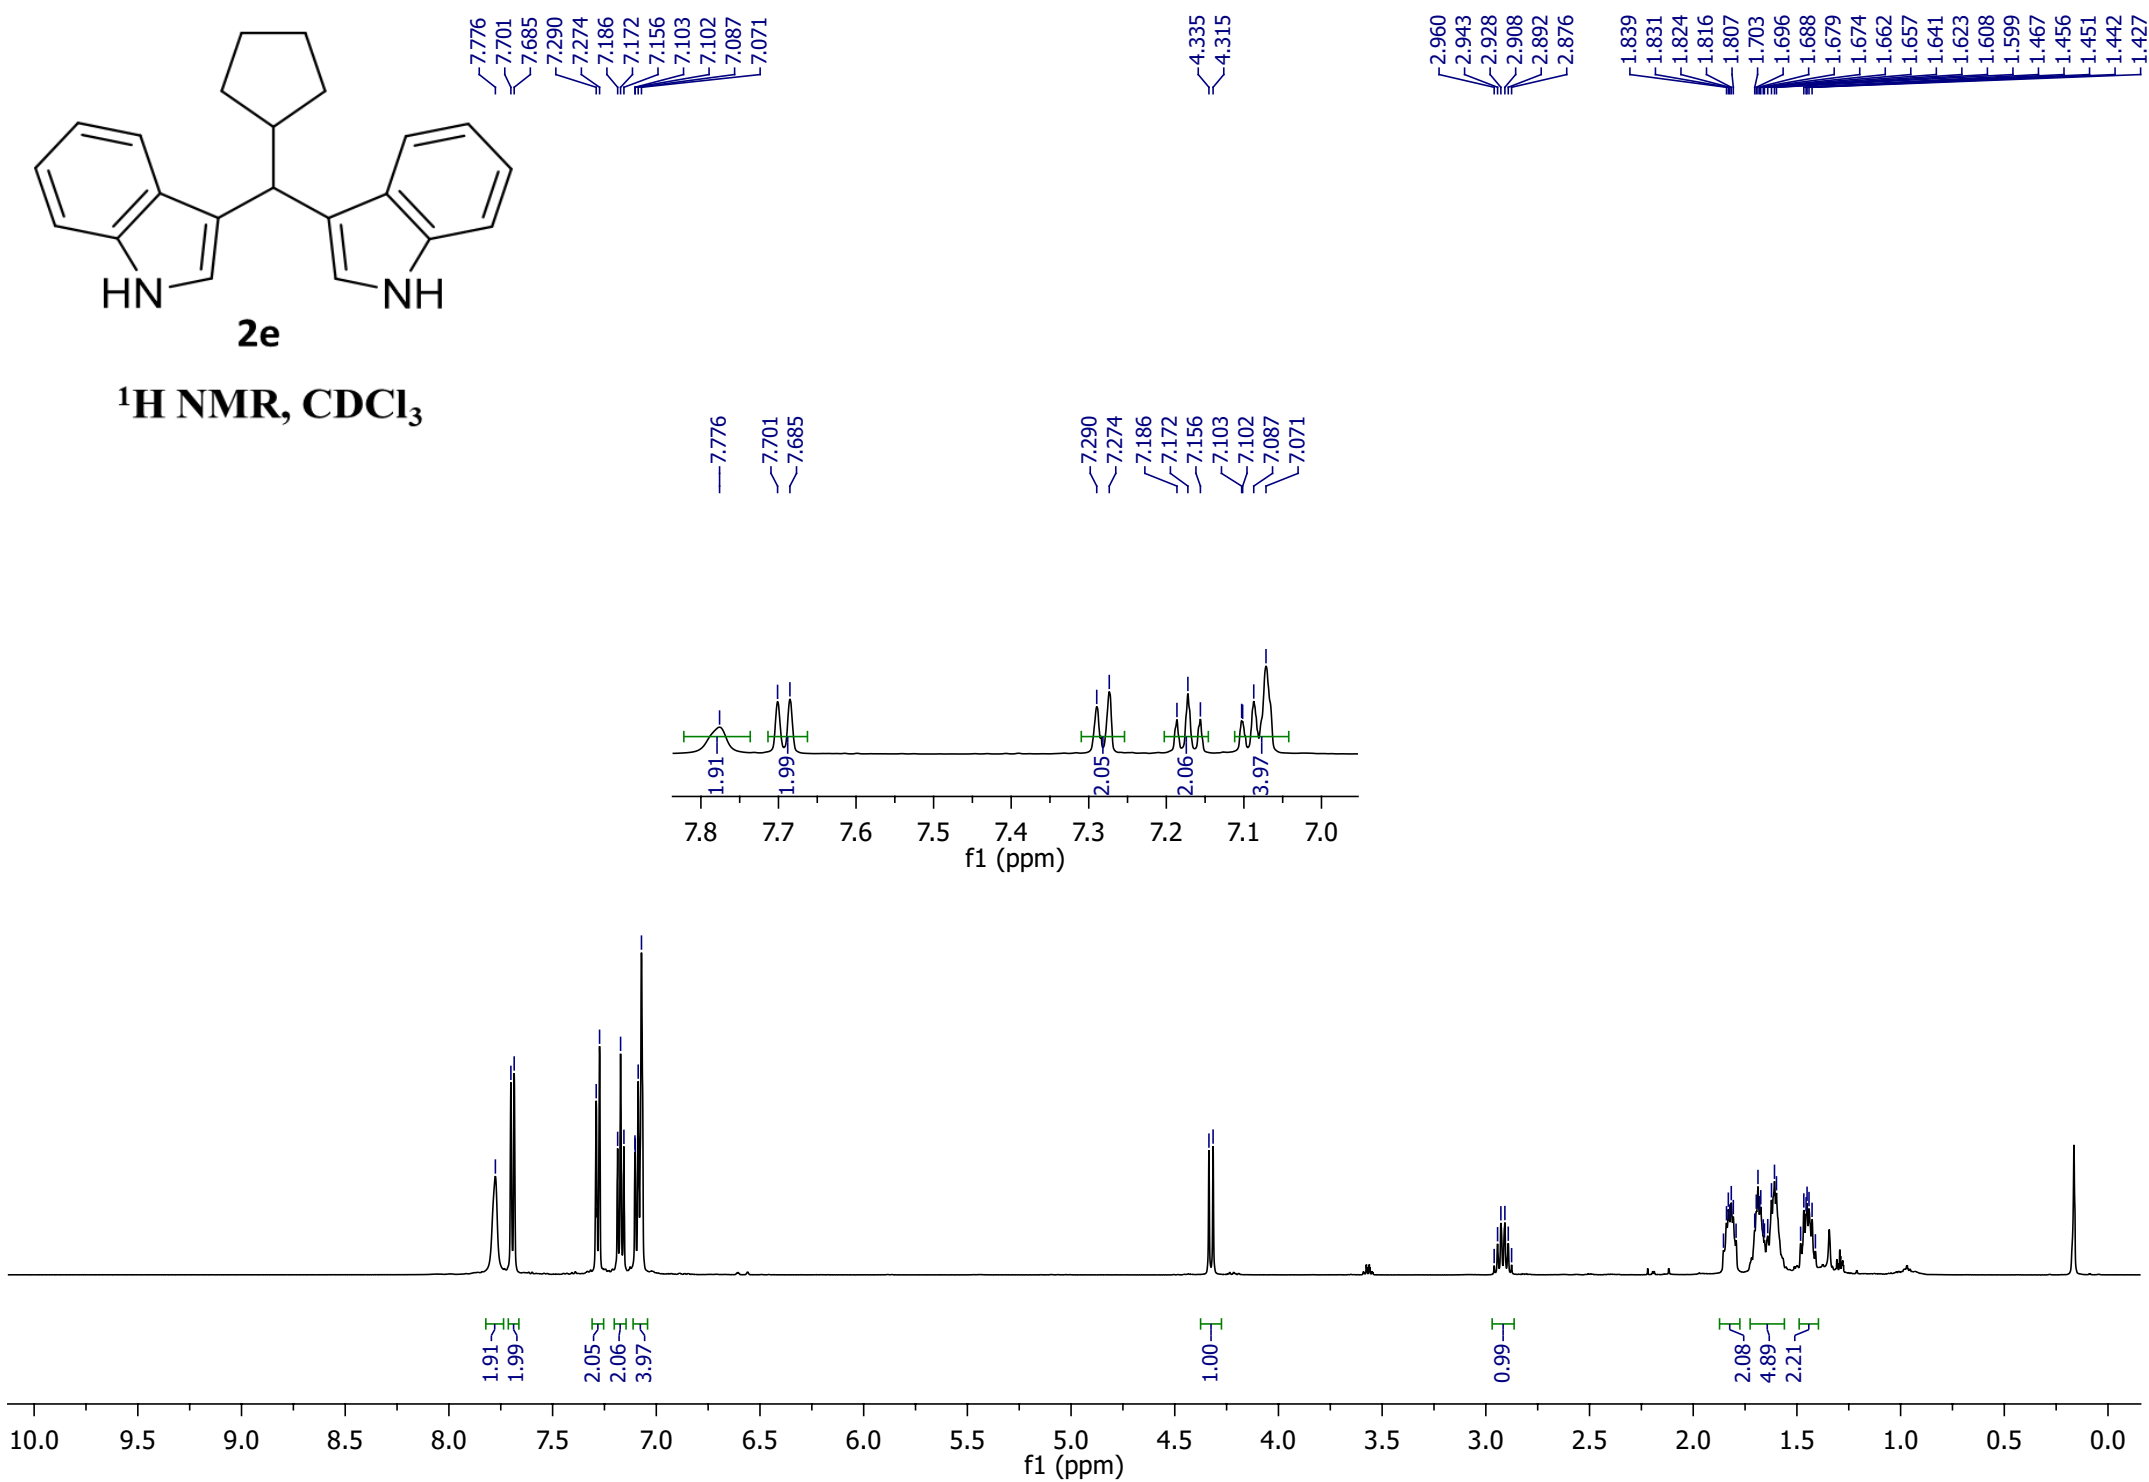



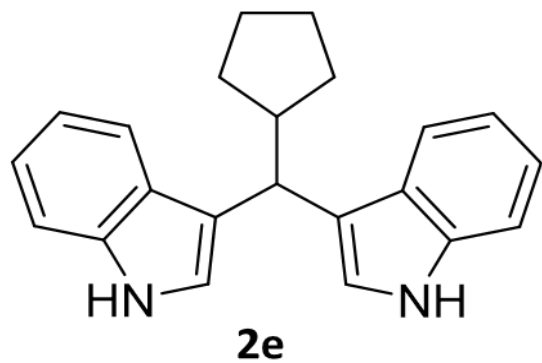

**$^{13}\text{C}$  NMR,  $\text{CDCl}_3$**

— 136.32  
— 127.54  
— 121.61  
— 121.50  
— 120.72  
— 119.66  
— 118.96  
— 111.05

— 77.35  
— 77.10  
— 76.84

— 45.35

— 39.52

— 32.38

— 25.57

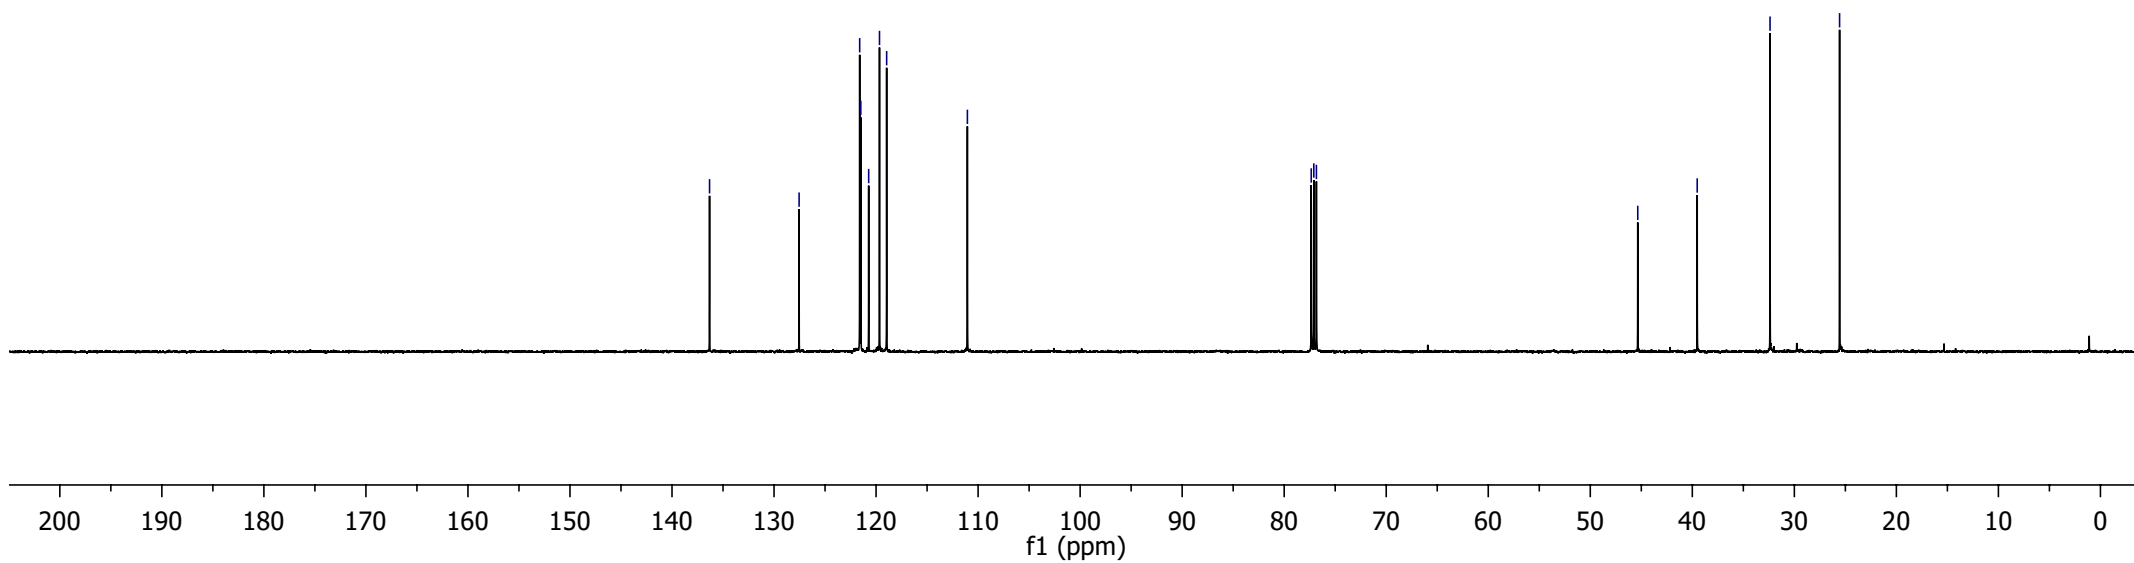

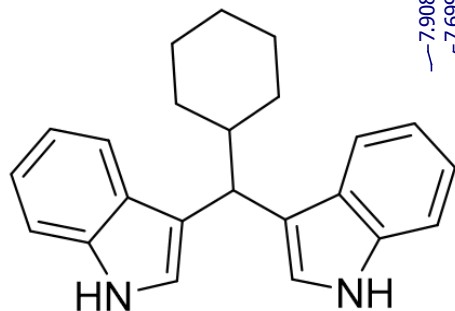

2f

<sup>1</sup>H NMR, CDCl<sub>3</sub>

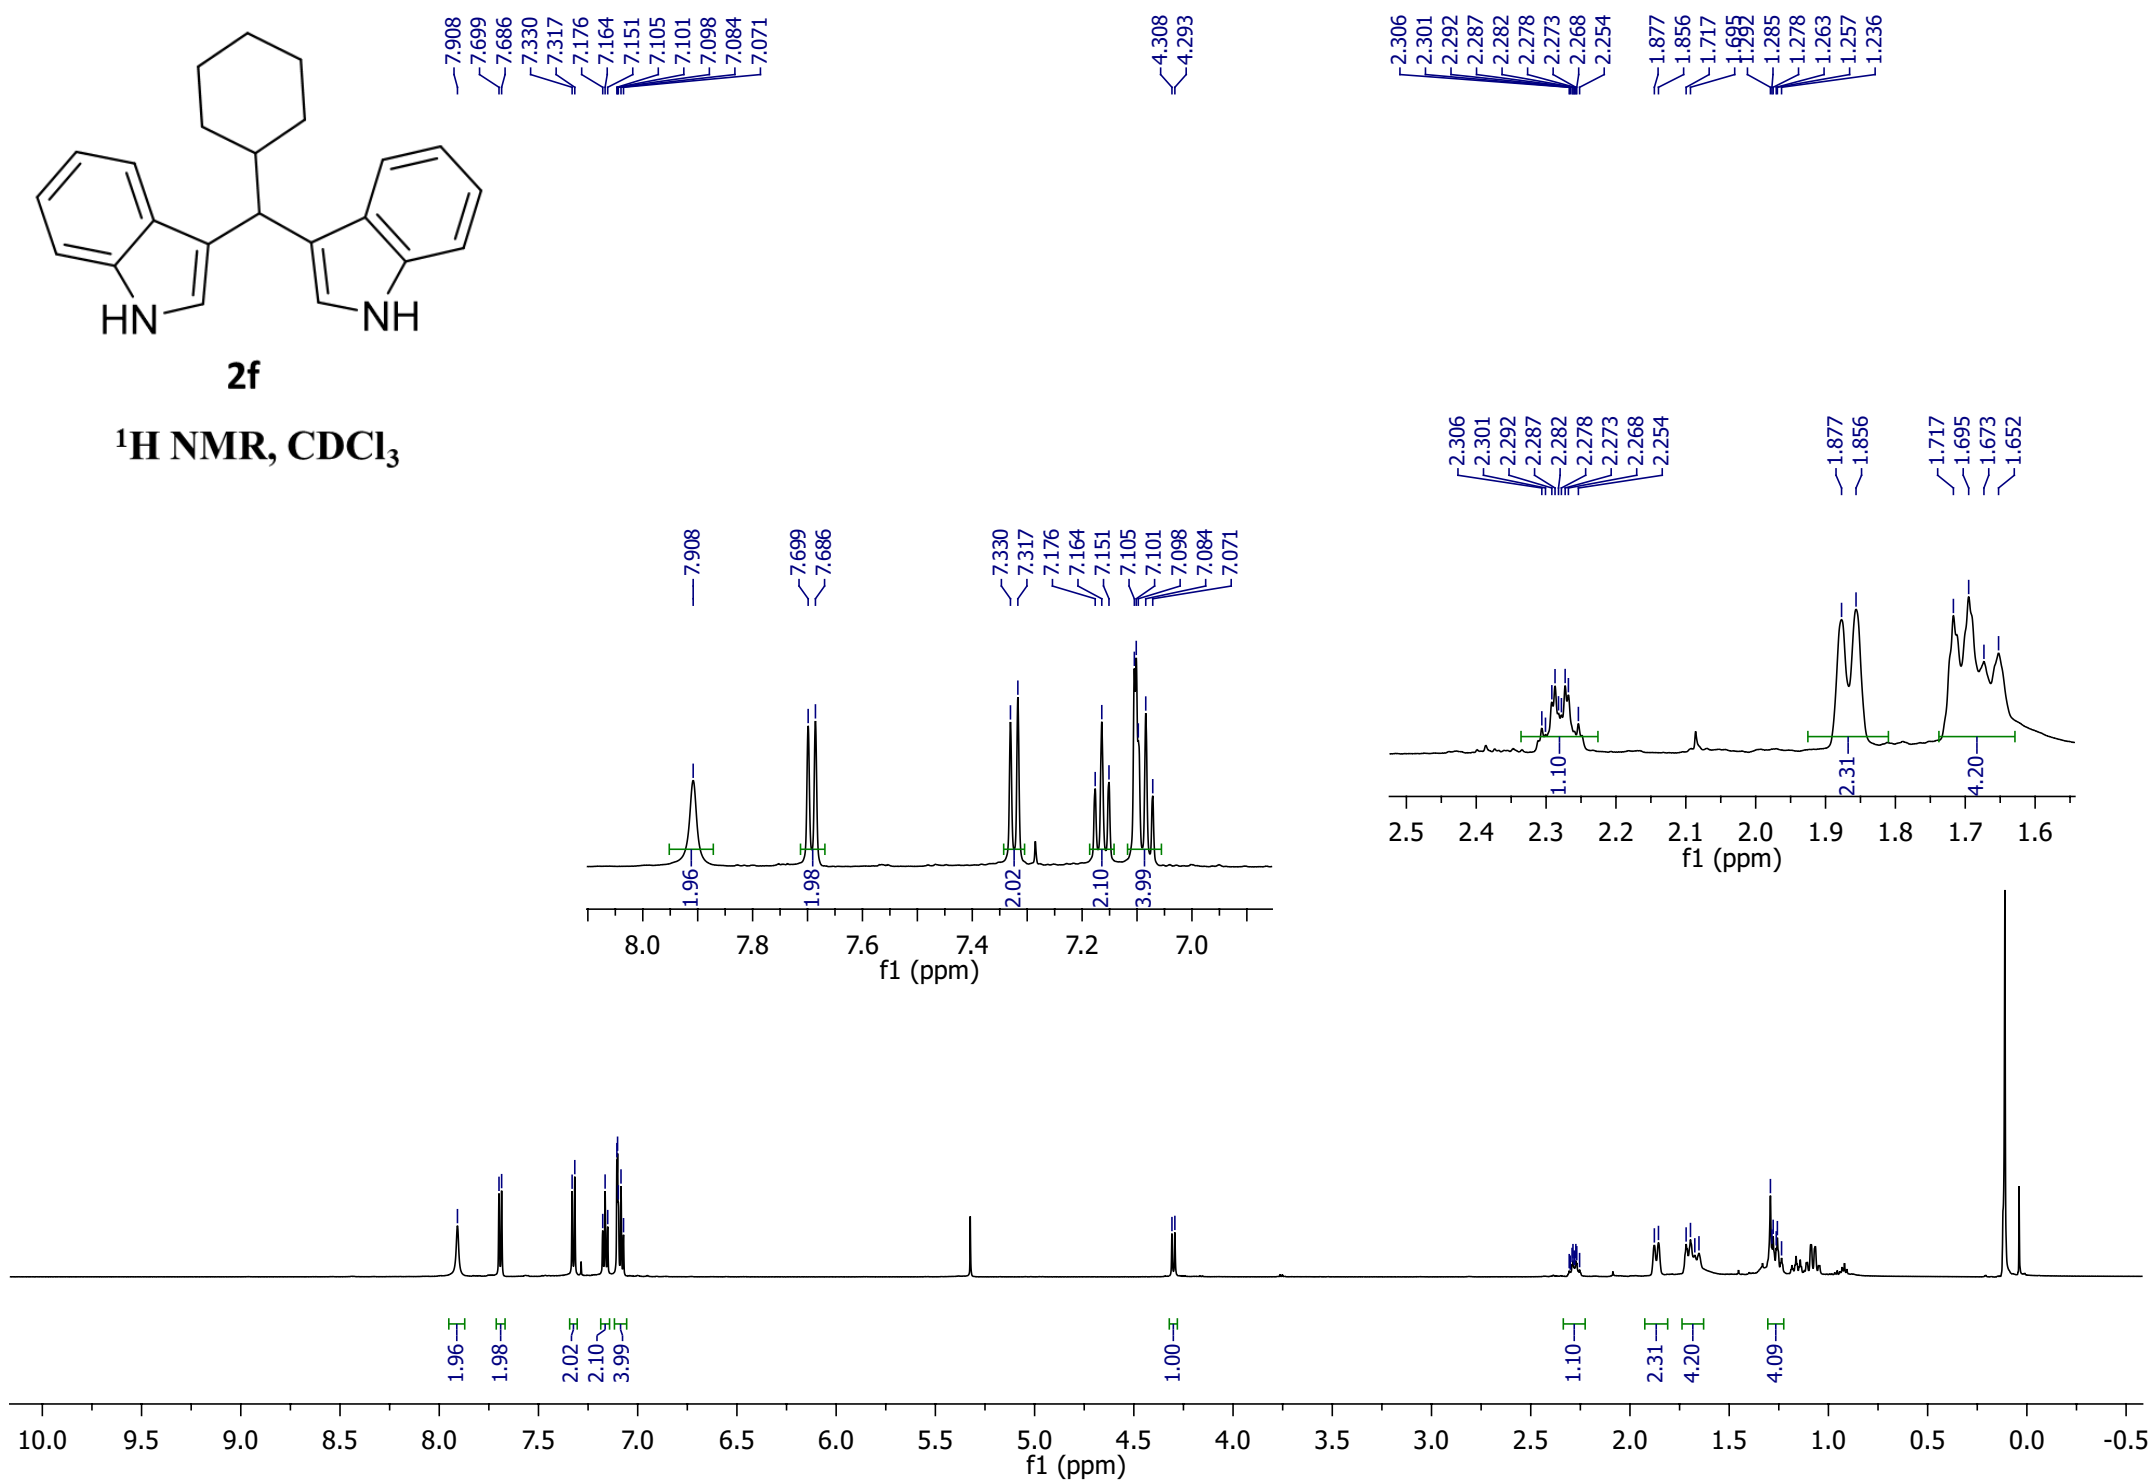

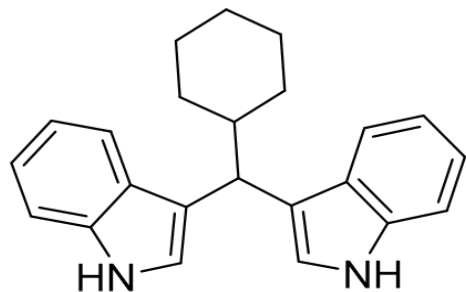

**2f**

**$^{13}\text{C}$  NMR,  $\text{CDCl}_3$**

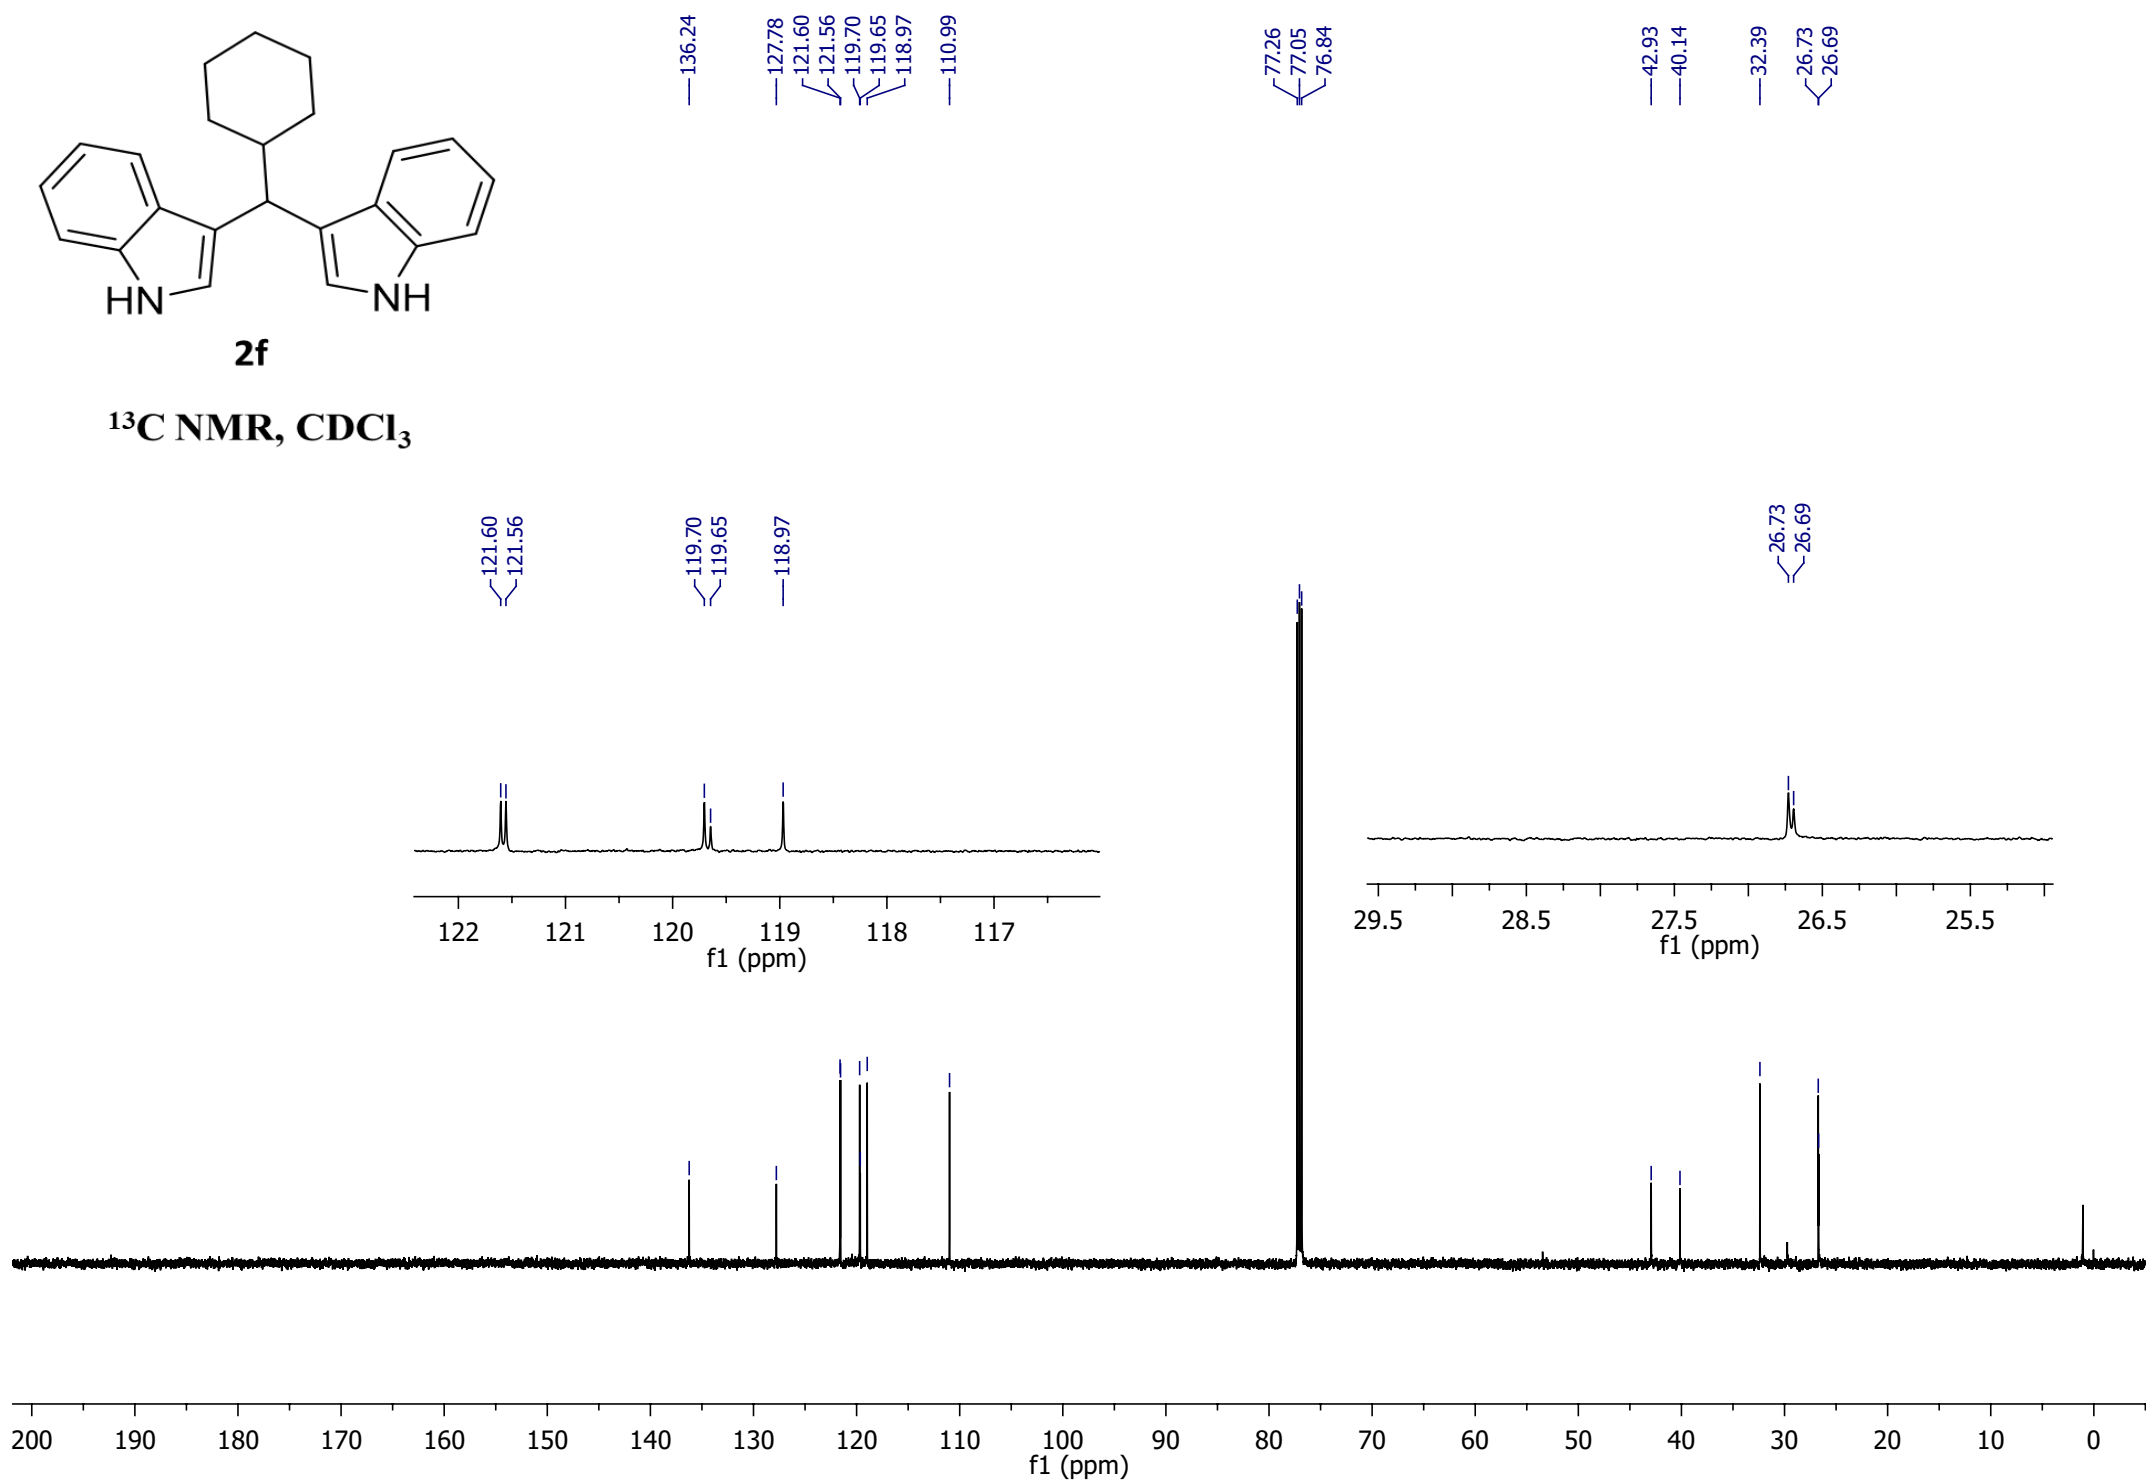

11.078  
11.074

7.424  
7.421  
7.393  
7.375  
7.320  
7.306  
7.291  
7.276  
7.260  
7.206  
7.190  
7.186  
7.173  
7.169  
6.885  
6.880  
—5.816

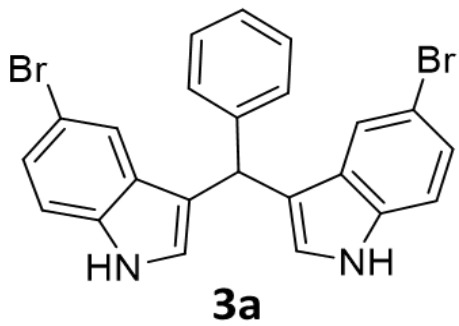

**<sup>1</sup>H NMR, DMSO-d<sub>6</sub>**

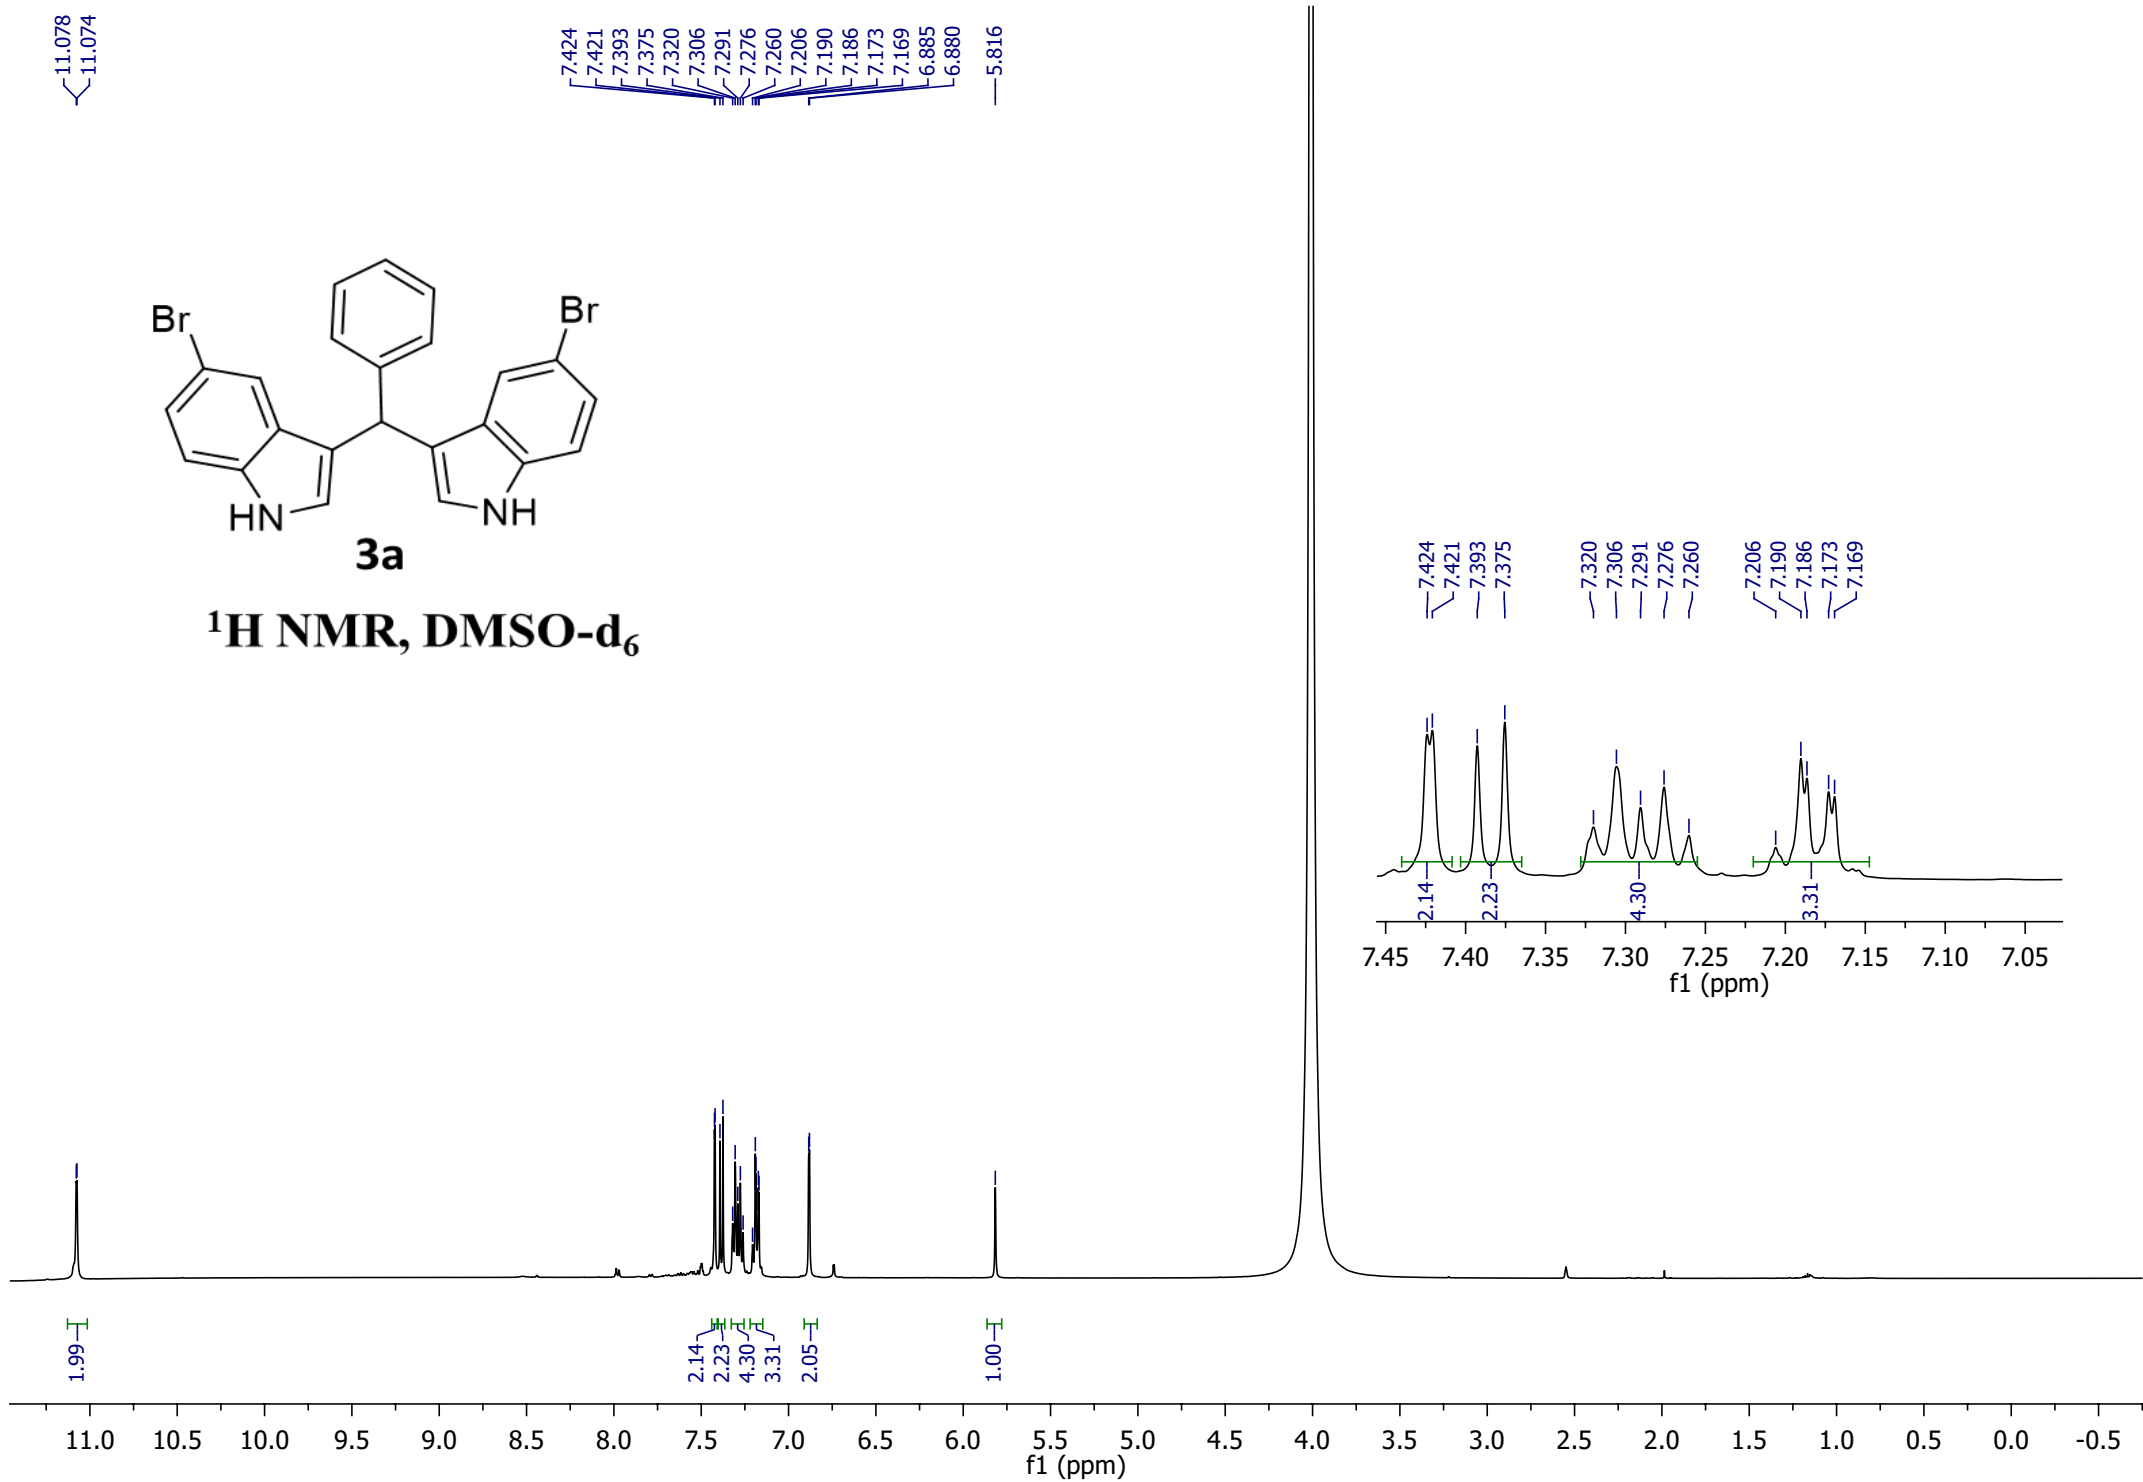

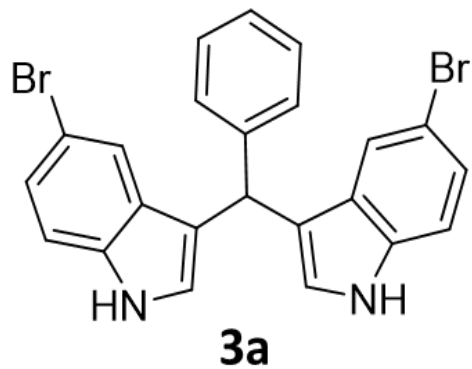

**$^{13}\text{C}$  NMR, DMSO- $\text{d}_6$**

— 149.23  
— 140.42  
— 133.48  
— 133.32  
— 131.41  
— 130.36  
— 128.81  
— 126.37  
— 126.28  
— 122.82  
— 118.89  
— 116.22

44.63  
44.46  
44.30  
44.24  
44.13  
43.96  
43.79  
43.63

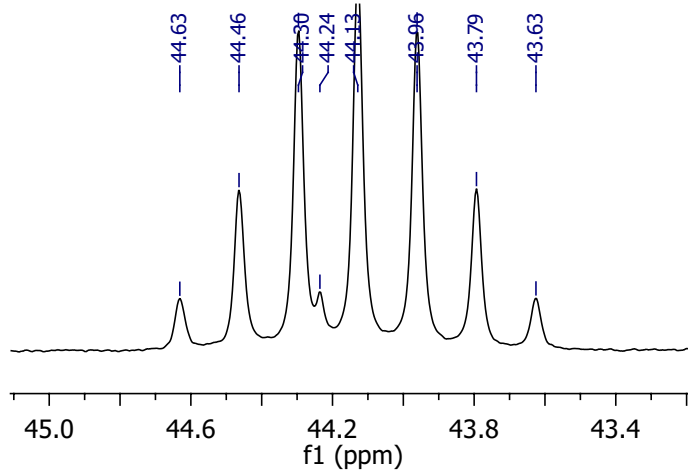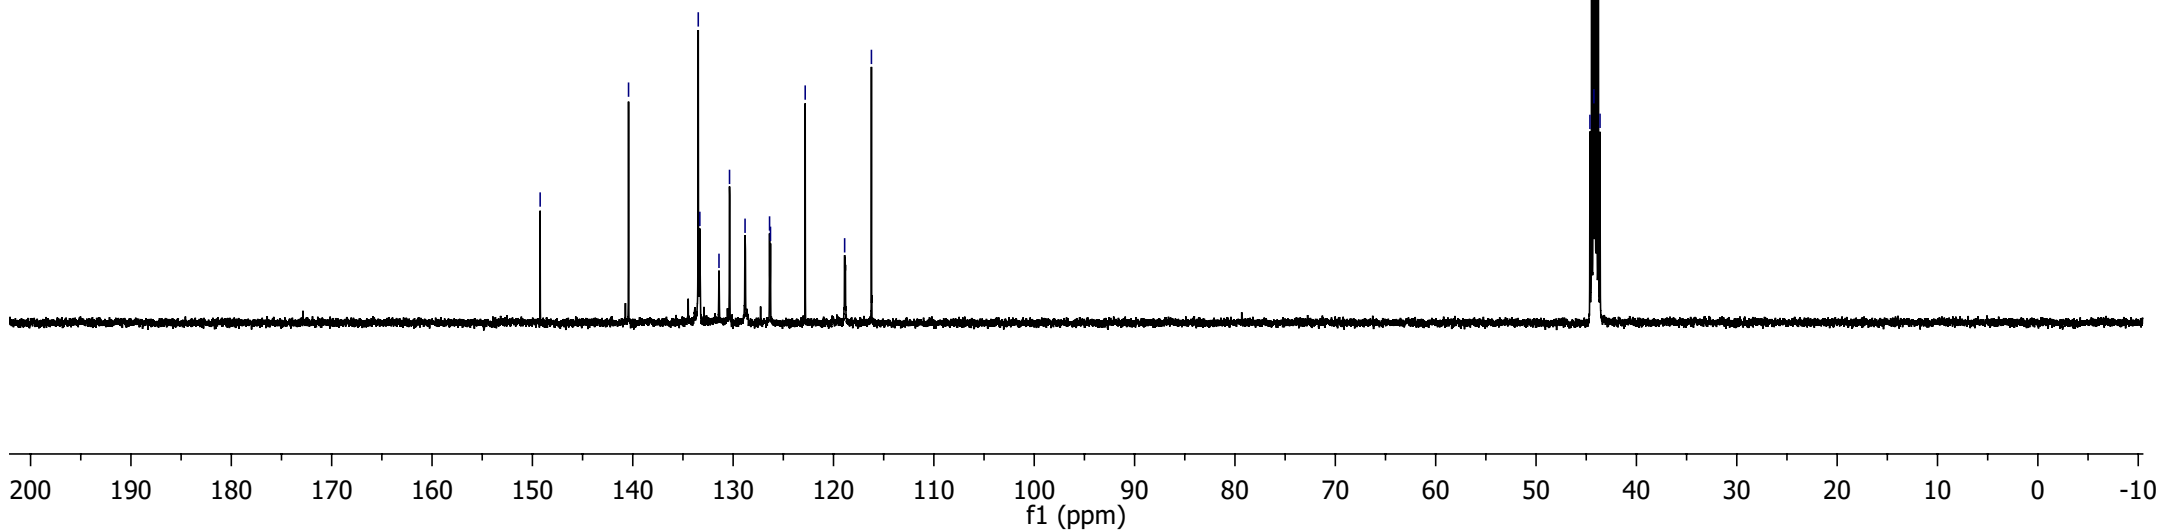

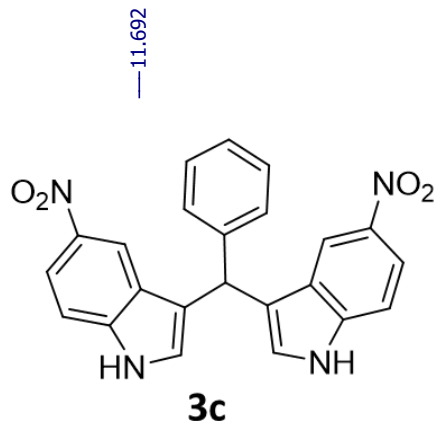

<sup>1</sup>H NMR, DMSO-d<sub>6</sub>

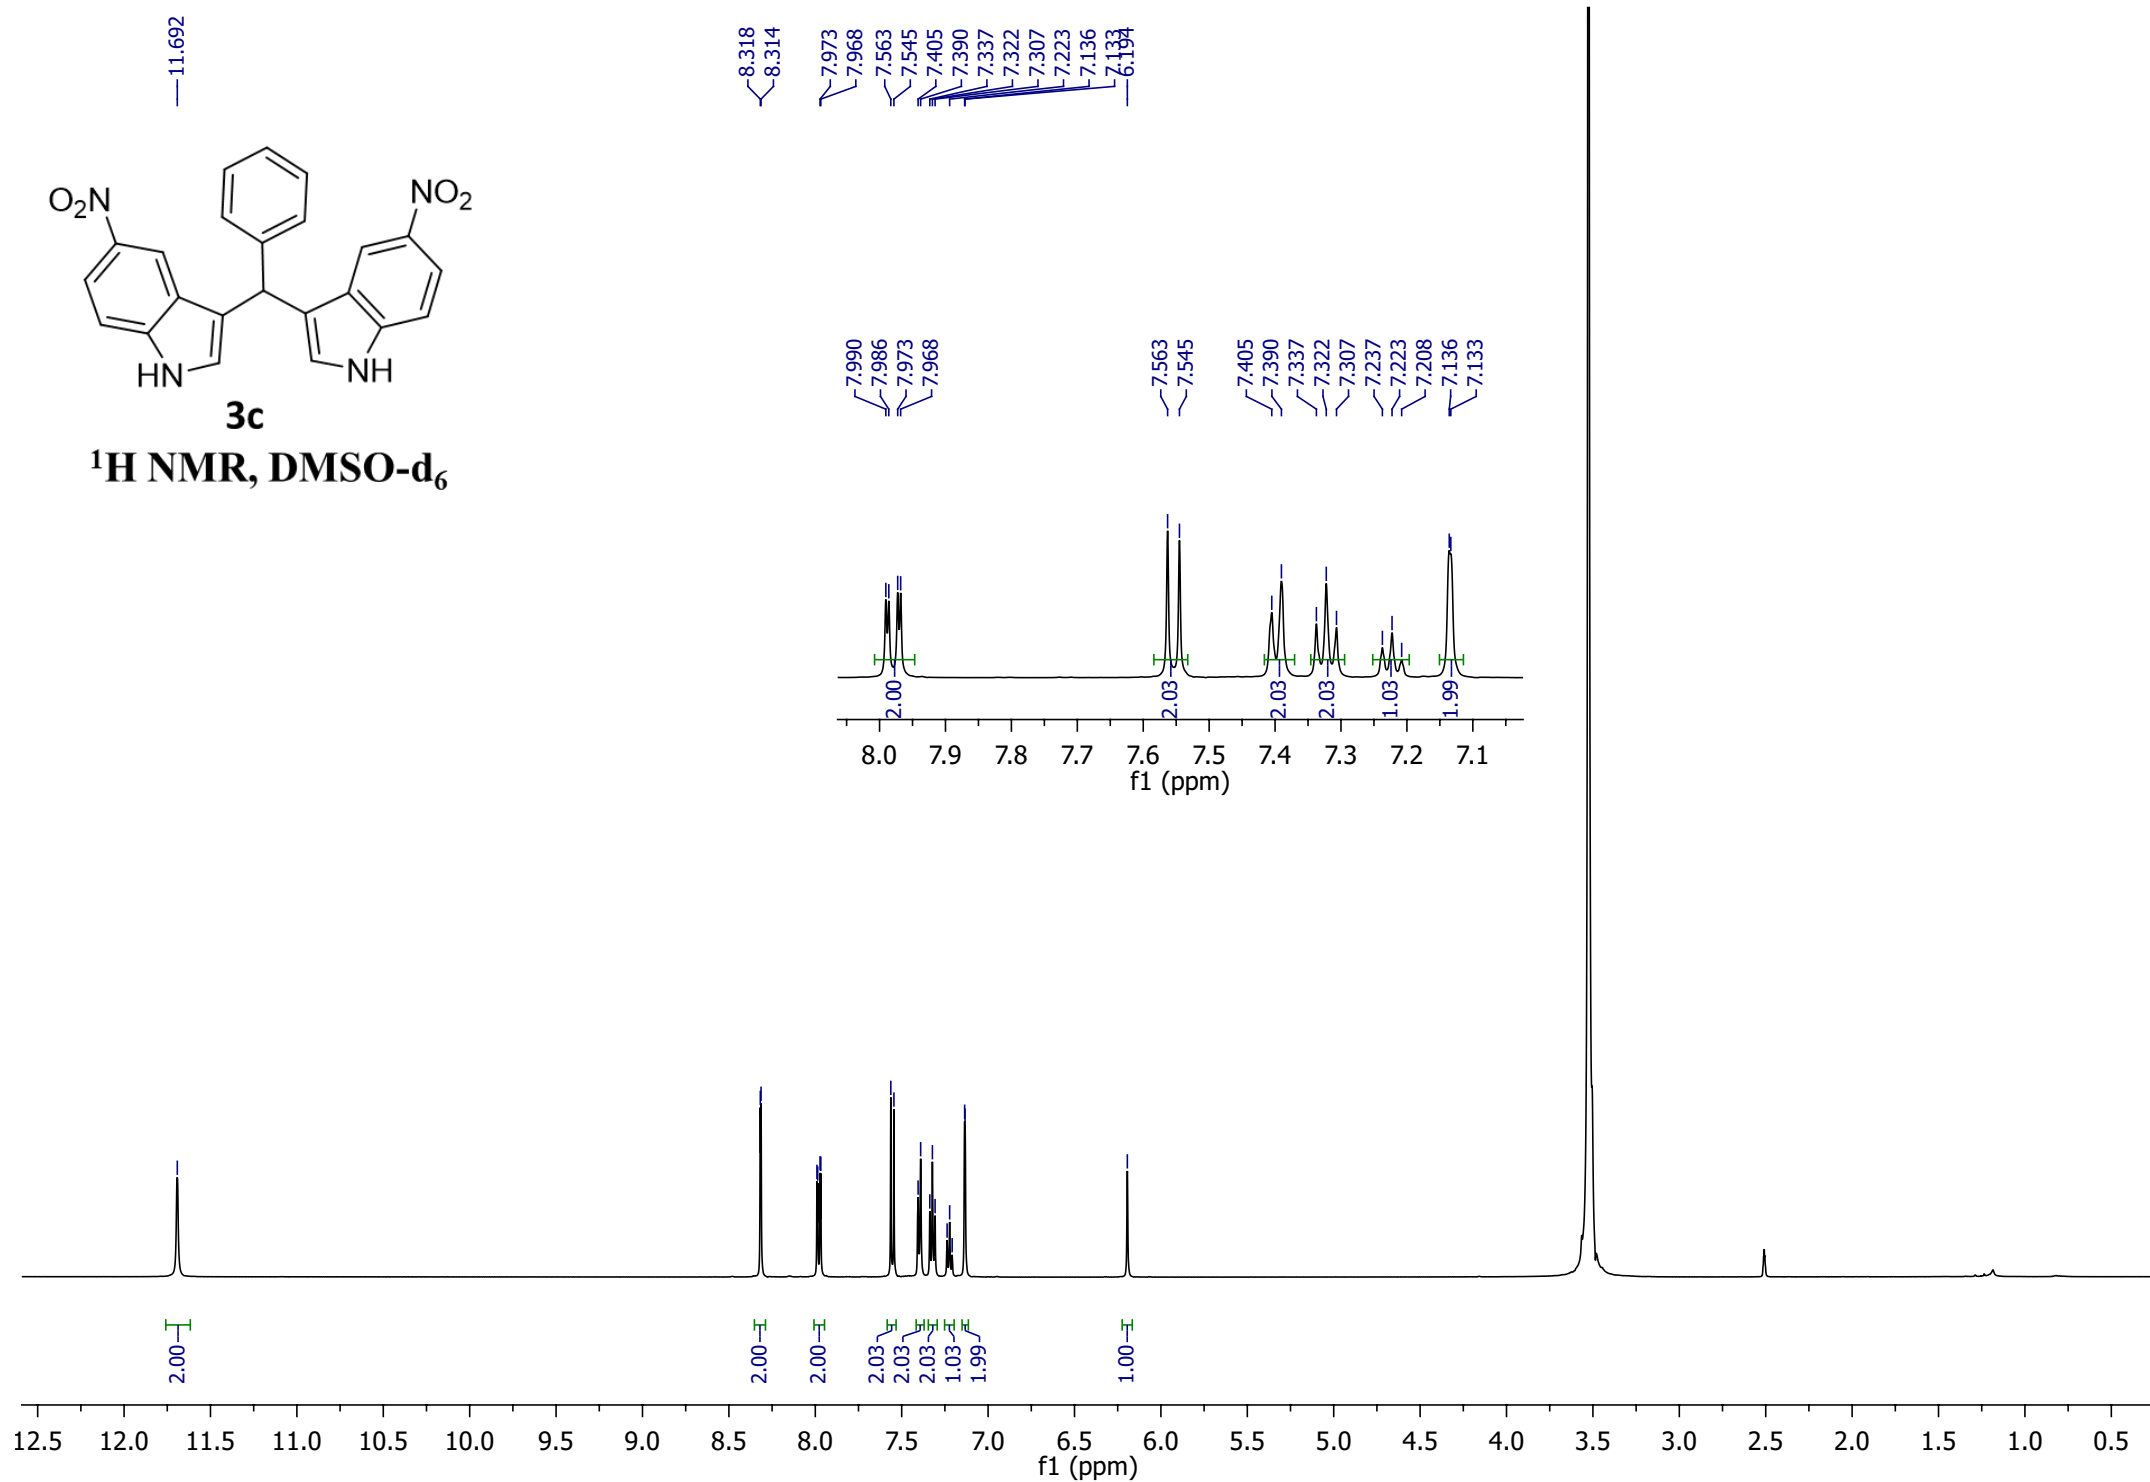

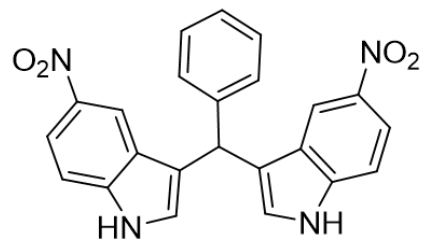

**3c**

**$^{13}\text{C}$  NMR, DMSO- $\text{d}_6$**

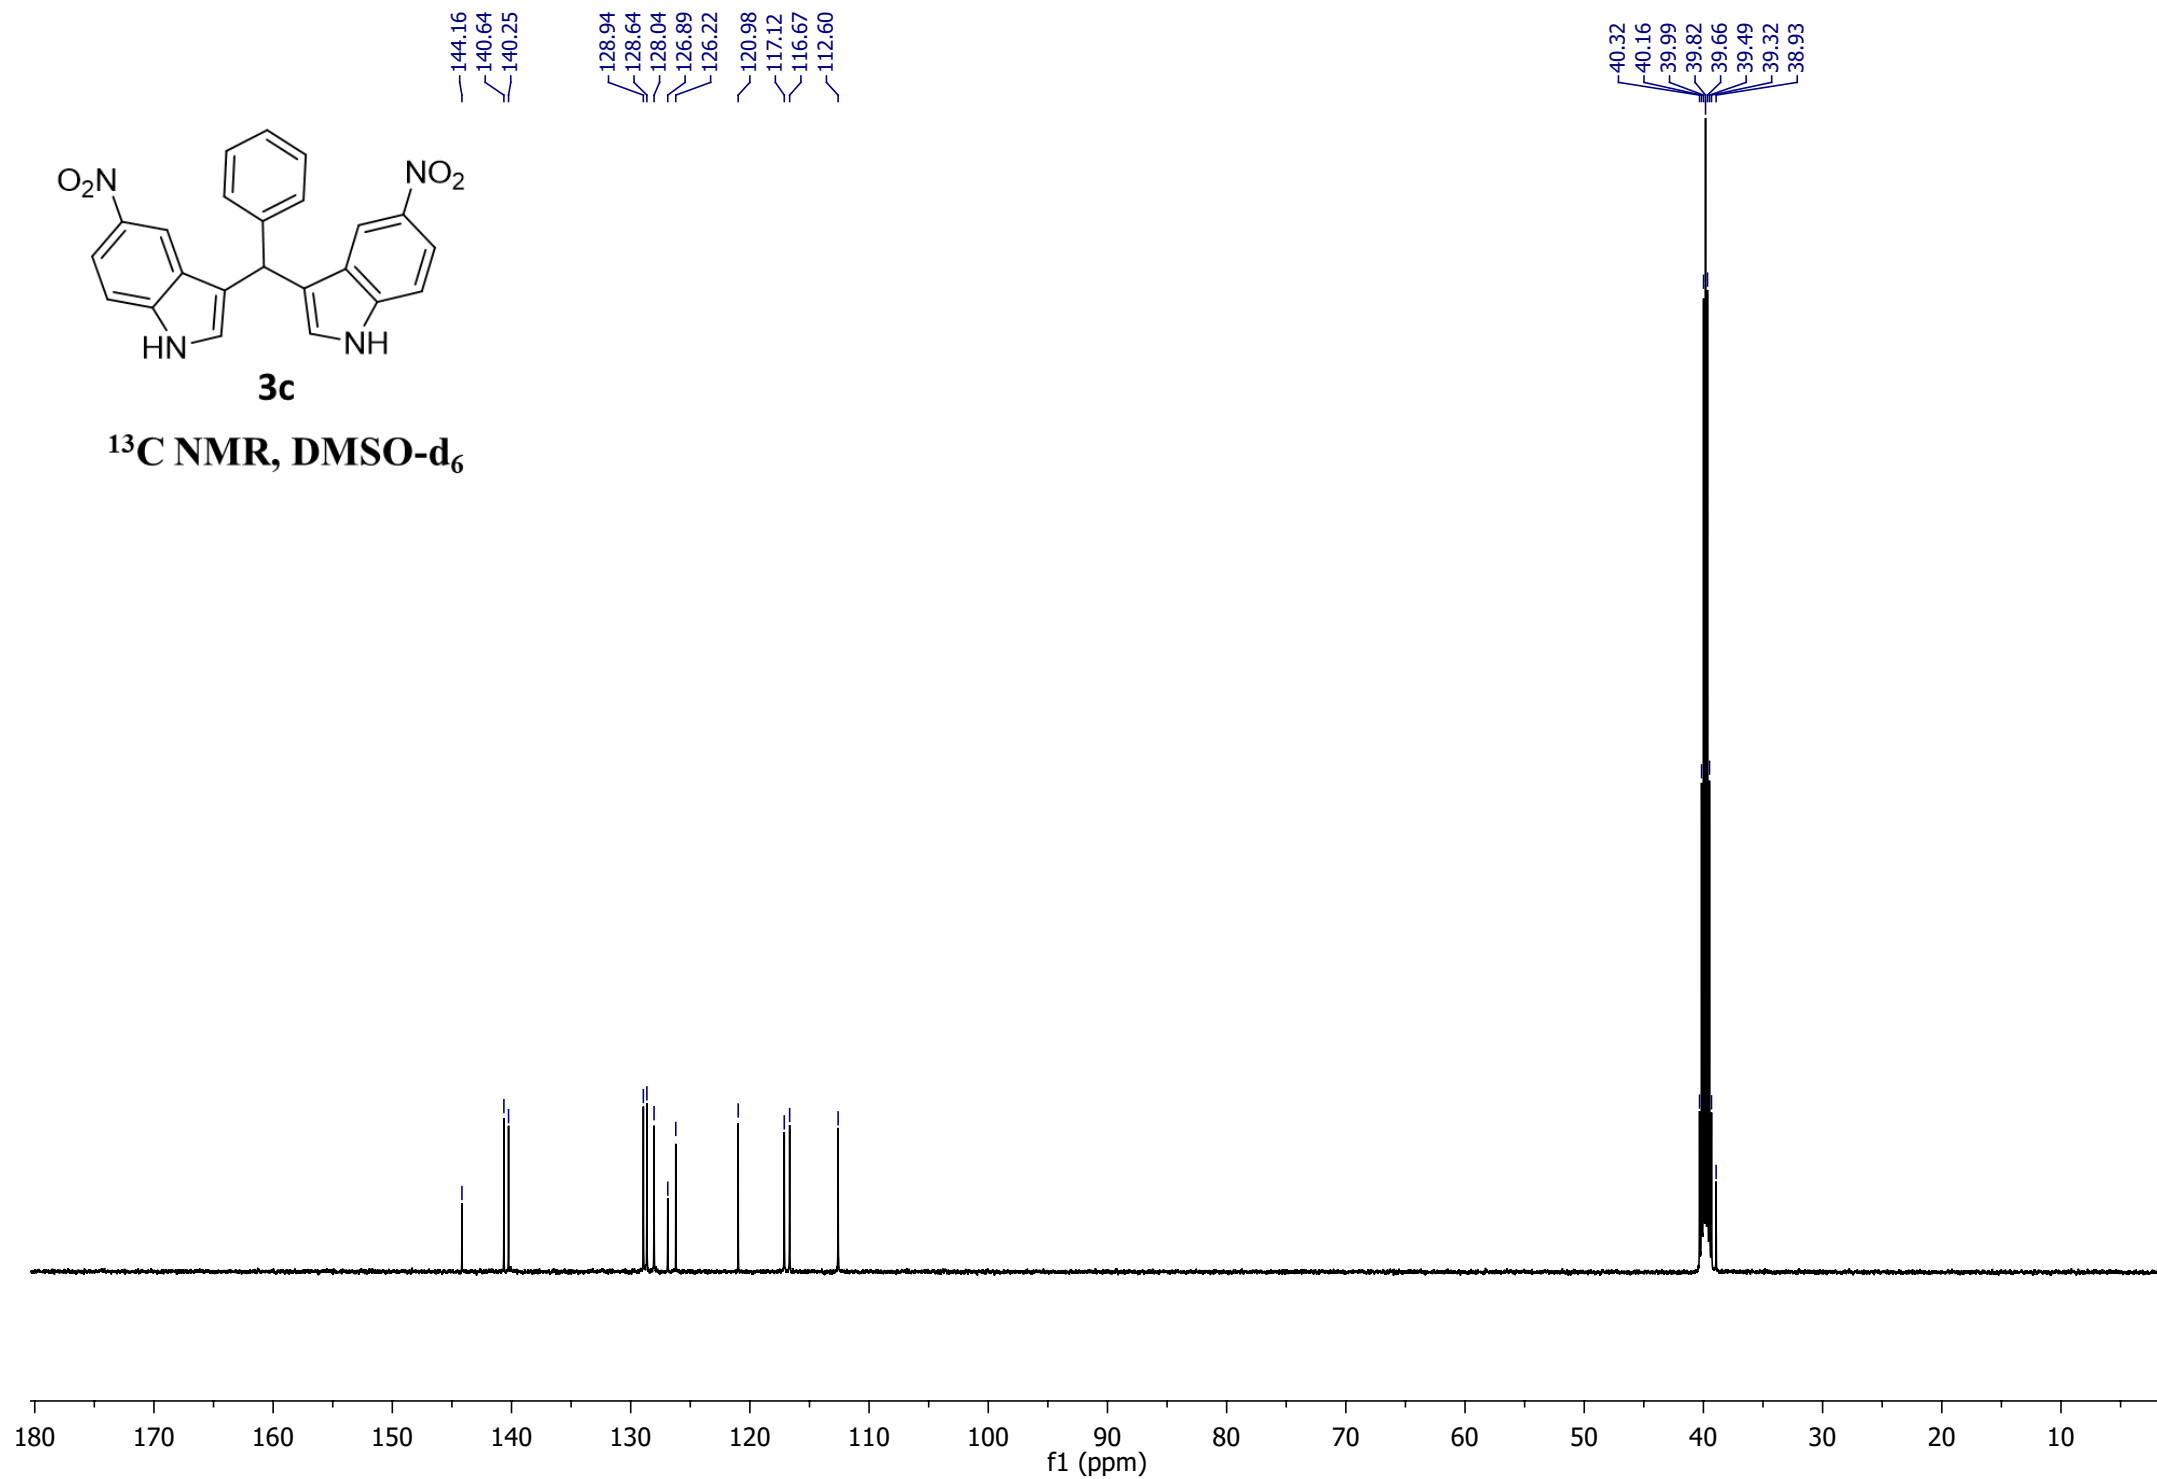

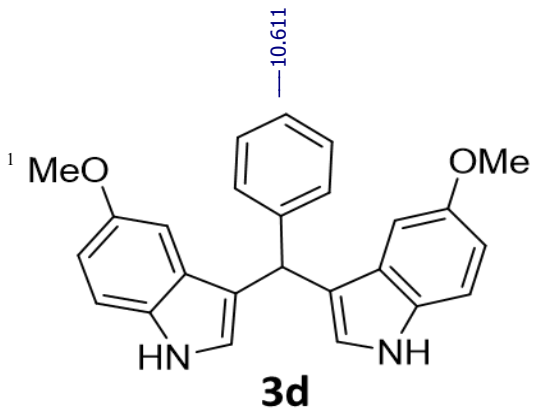

**<sup>1</sup>H NMR, DMSO-d<sub>6</sub>**

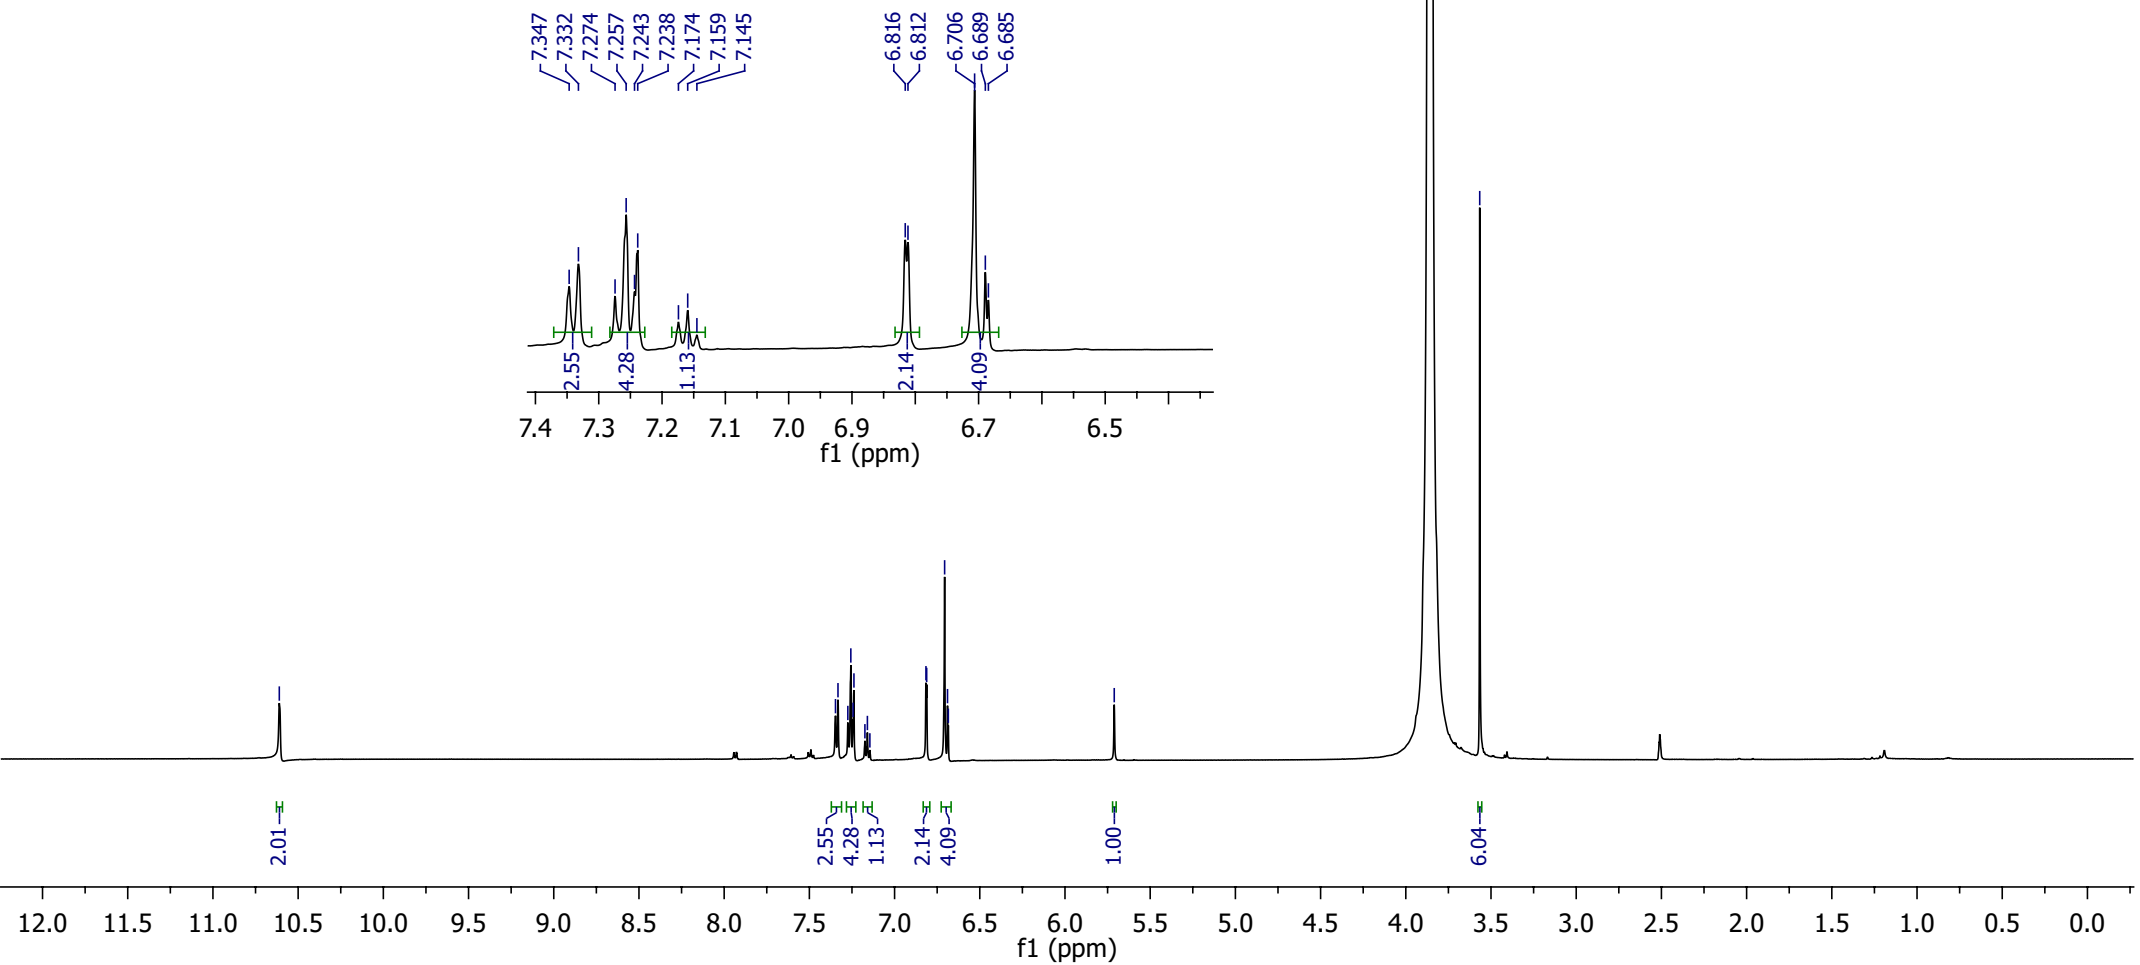



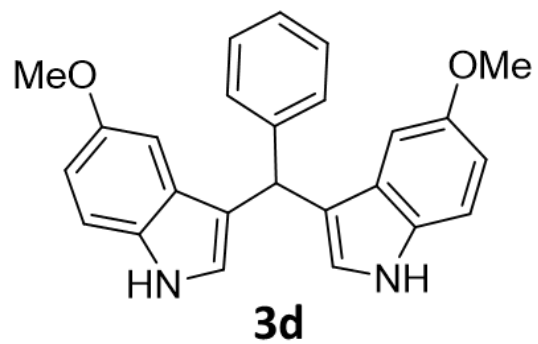

**$^{13}\text{C}$  NMR, DMSO- $\text{d}_6$**

—153.06  
—145.30  
—132.18  
—128.69  
—128.51  
—127.39  
—126.30  
—124.68  
—118.14  
—112.56  
—110.98  
—101.92  
—55.70  
—40.07  
—39.93  
—39.76  
—39.60  
—39.42  
—39.26  
—39.09  
—38.93

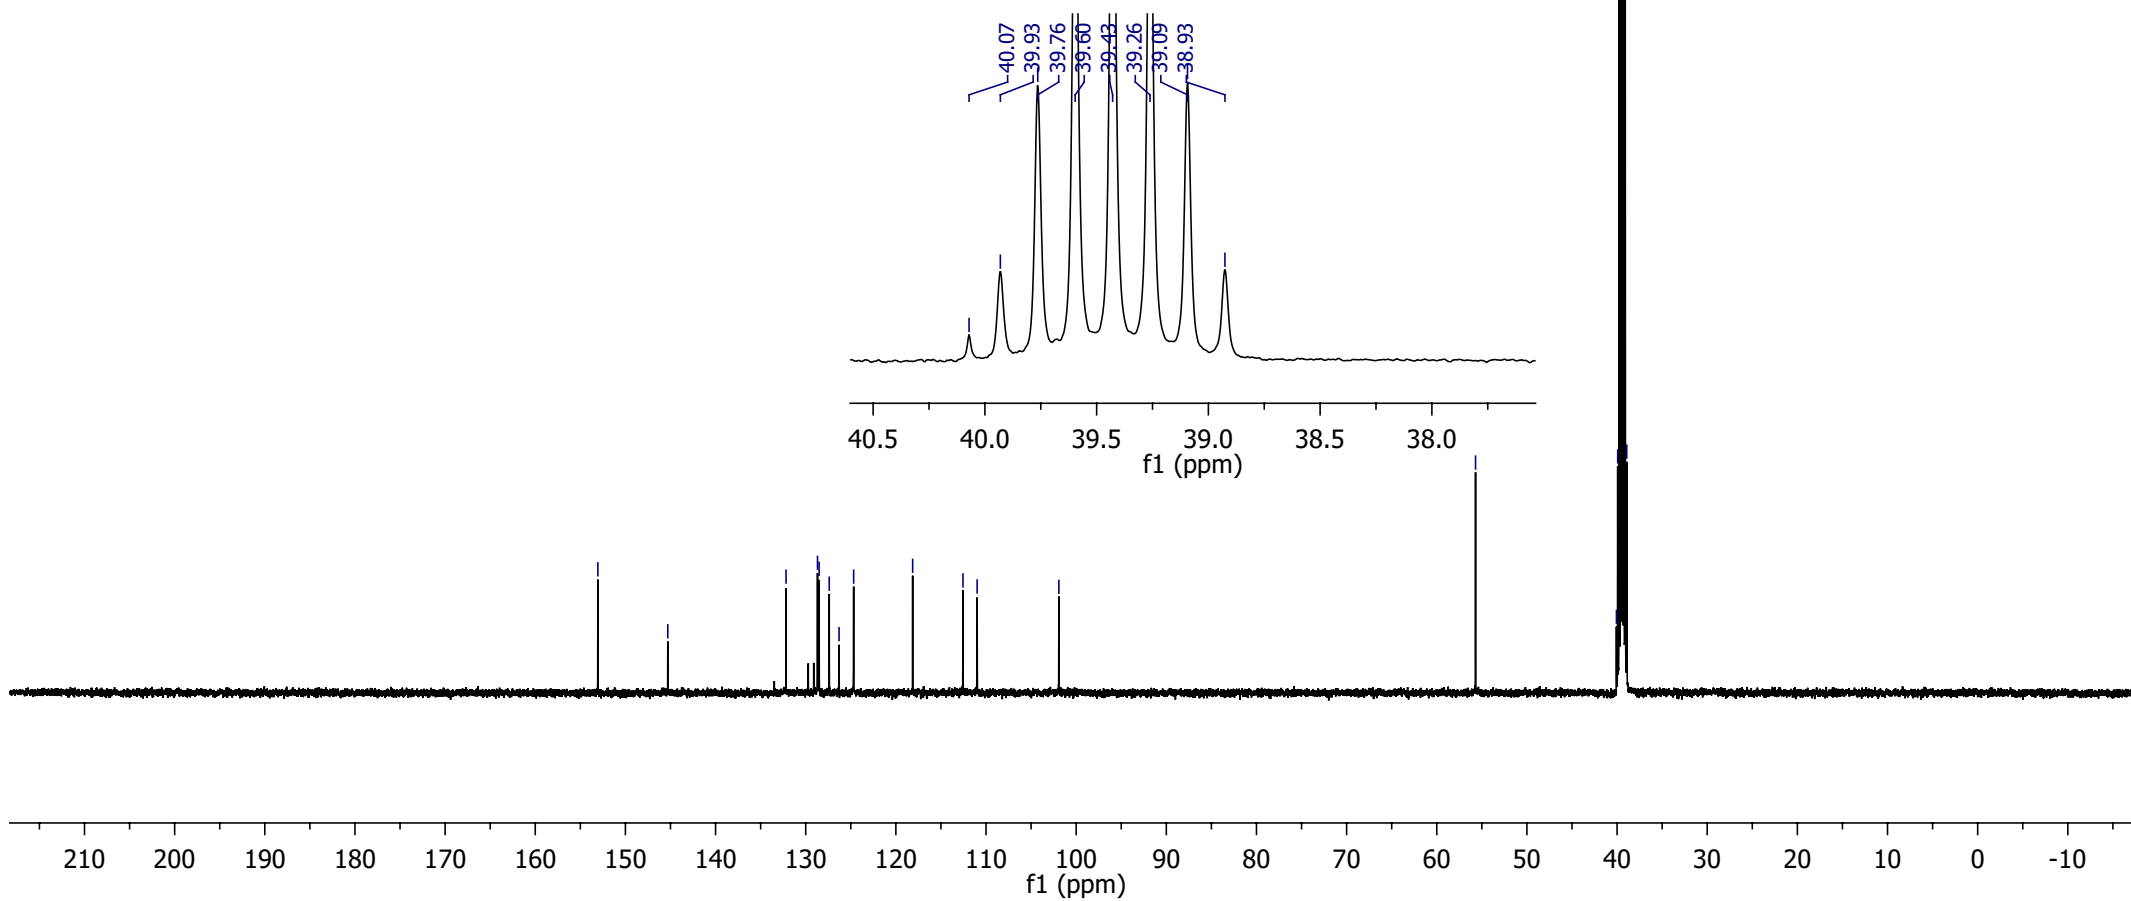

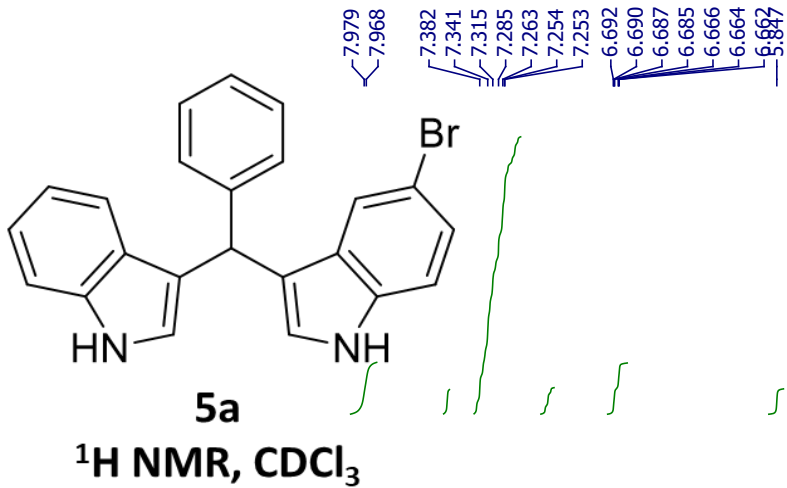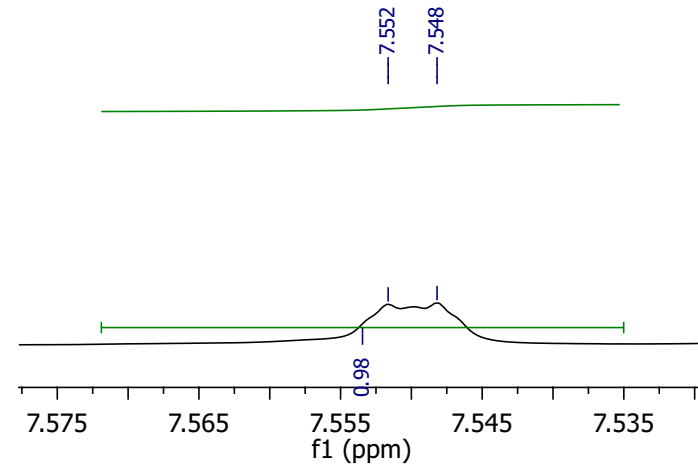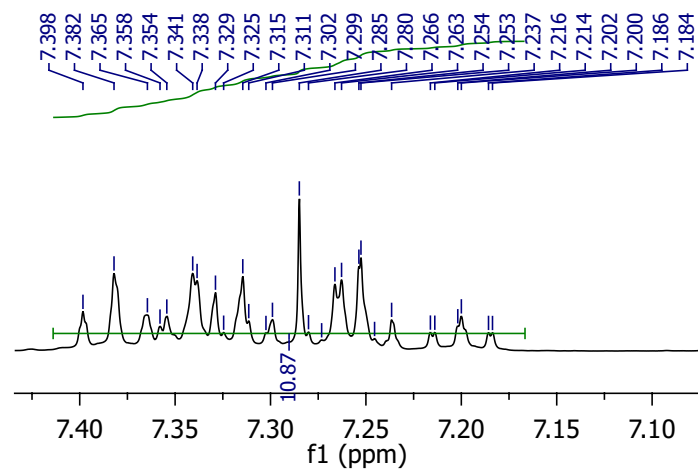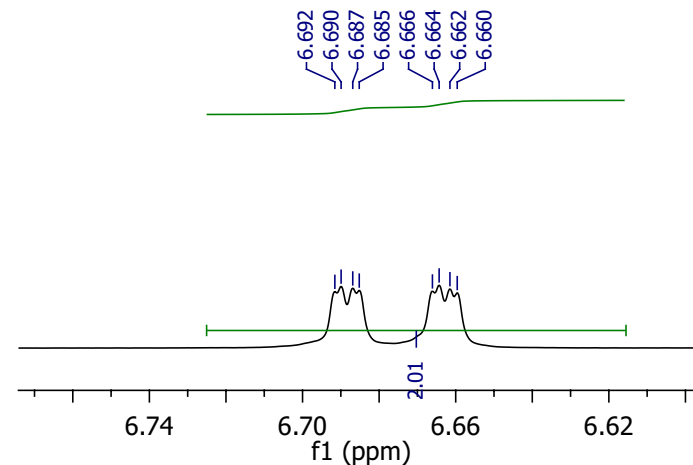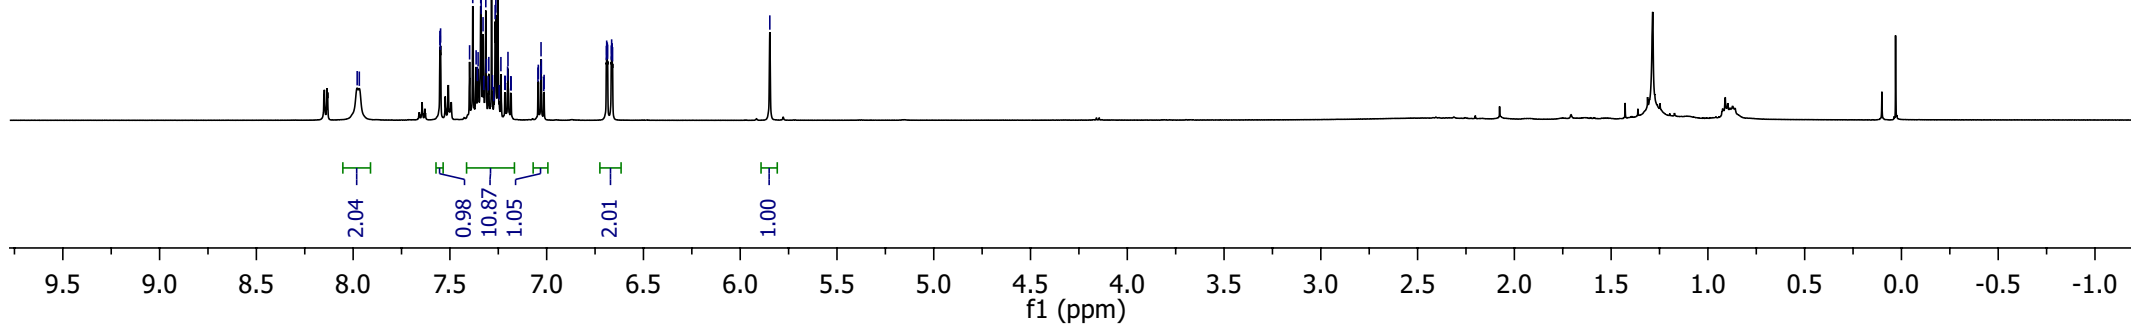

Supplement: d2nj02525f1.pdf [file d2nj02525f1.pdf]
